## 1 Untargeted metabolomic study of autism in newborn screening samples: a pilot study.

2  
3 Julie Courraud<sup>1,2</sup>, Madeleine Ernst<sup>1,2</sup>, Susan Svane Laursen<sup>1</sup>, David M. Hougaard<sup>1,2</sup>, Arie S. Cohen<sup>1</sup>

4  
5 <sup>1</sup> Section for Clinical Mass Spectrometry, Department of Congenital Disorders, Danish Center for  
6 Neonatal Screening, Statens Serum Institut Copenhagen, Copenhagen, Denmark

7 <sup>2</sup> iPSYCH, The Lundbeck Foundation Initiative for Integrative Psychiatric Research, Aarhus, Denmark

8  
9 **Correspondence:** Julie Courraud (julc@ssi.dk), Section for Clinical Mass Spectrometry, Department  
10 of Congenital Disorders, Danish Center for Neonatal Screening, Statens Serum Institut, Artillerivej 5,  
11 2300 Copenhagen S, Denmark

12 ORCID 0000-0002-6797-7129

### 13 14 **Abstract:**

#### 15 **Background**

16 The etiopathology of autism spectrum disorder (ASD) is unclear. Main risk factors include both genetic  
17 and non-genetic factors, especially prenatal and perinatal events. The Danish Neonatal Screening  
18 Biobank in connection with registry data provides unique opportunities to study early signs of disease.  
19 Therefore, we aimed to study the metabolomic profiles of dried blood spot (DBS) of newborns later  
20 diagnosed with ASD.

#### 21 **Methods**

22 From the iPsych cohort, we randomly selected 37 subjects born in 2005 and diagnosed with ASD in  
23 2012 (cases) together with 37 matched controls and submitted their biobanked DBS to an LC-MS/MS-  
24 based untargeted metabolomics protocol. Raw data were preprocessed using MZmine 2.41.2 and

25 metabolites were subsequently putatively annotated using mzCloud, GNPS feature-based molecular  
26 networking and other metabolome mining tools (MolNetEnhancer). Statistical analyses and data  
27 visualization included principal coordinates analyses, PERMANOVAs, t-tests, and fold-change  
28 analyses.

## 29 **Results**

30 4360 mass spectral features were detected, of which 150 could be putatively annotated at a high  
31 confidence level. Chemical structure information at a broad level could be retrieved for a total of 1009  
32 metabolites, covering 31 chemical classes including bile acids, various lipids, nucleotides, amino acids,  
33 acylcarnitines and steroids. Although the untargeted analysis revealed no clear distinction between  
34 cases and controls, 18 compounds repeatedly reported in the ASD literature could be detected in our  
35 study and three mass spectral features were found differentially abundant in cases and controls before  
36 FDR correction. In addition, our results pinpointed important other factors influencing chemical  
37 profiles of newborn DBS samples such as gestational age, age at sampling and month of birth.

## 38 **Limitations**

39 Inherent to pilot studies, our sample size was insufficient to reveal metabolic markers of ASD.  
40 Nevertheless, we were able to establish an efficient metabolomic data acquisition and analysis pipeline  
41 and flag main confounders to be considered in future studies.

## 42 **Conclusions**

43 In this first untargeted DBS metabolomic study, newborns later diagnosed with ASD did not show a  
44 significantly different metabolic profile when compared to controls. Nevertheless, our method covered  
45 many metabolites associated with ASD in previous studies, suggesting that biochemical markers of  
46 ASD are present at birth and may be monitored during newborn screening.

47

48 **Keywords:** autism, dried blood spots, untargeted metabolomics, newborn screening, biomarkers

49

## 50 **Background**

51 The etiopathology of ASD is still unclear and today ASD is diagnosed based on behavioral signs and  
52 assessment of communication skills [1,2]. How the condition should be classified is debated [3,4], as  
53 well as which tests offer the most reliable conclusions [1]. In Europe, detection services based on  
54 behavioral signs are usually accessed on average at 18 months of age, and diagnosis occurs on average  
55 at 36 months of age [5]. In this setting, early intervention is a challenge and has been reported to start in  
56 Europe at 42 months of age on average [5]. Whether behavioral impairments are reflected in the blood  
57 as biochemical abnormalities is still unsure, but the quest for biomarkers is legitimate, as they would  
58 represent a useful tool to help in the diagnosis and treatment of ASD and in understanding its  
59 underlying molecular mechanisms [6].

60

61 The main risk factors for ASD include genetic [7,8] and non-genetic factors, especially exposure during  
62 fetal life [1,9–11]. Prenatal stress could influence fetal brain development and interact with genetic  
63 predispositions thereby enhancing the risk of future psychiatric disorders [12,13]. Among prenatal  
64 outcomes, maternal infection accompanied by fever during the second trimester of pregnancy has been  
65 found to increase the risk of ASD twofold approximately [14]. Among perinatal outcomes, preterm  
66 birth (<37 weeks) and low birthweight (small for gestational age) have been associated with an  
67 increased risk of ASD as well as high frequency ventilation and intracranial hemorrhage [15]. Low  
68 Apgar scores, a score used to summarize vital signs and assess health in newborns [16], also have  
69 recently been associated with an increased risk of developing ASD [17].

70

71 Gastrointestinal tract disorders are often reported in ASD children, along with certain foods or diets  
72 impacting the severity of symptoms [18–21]. There is a growing evidence of strong interactions

73 between gut and brain through microbiota [22,23], and these observations support the notion that ASD  
74 is associated with metabolic malfunction such as decrease in sulphation capacity [18], and potentially  
75 connected to gut microbial populations and functions [20]. It has also been shown that many small  
76 molecules differing between normally-developing and ASD individuals likely result from microbial  
77 metabolism [20,24,25]. Recently, plasma and stool metabolites have been associated with poor  
78 communication scoring at age 3, and with good prediction of autism by age 8 [26]. Sharon and  
79 collaborators (Sharon et al. 2019) have shown that microbiome and metabolome profiles of mice  
80 harboring human microbiota predict that specific bacterial taxa and their metabolites modulate ASD  
81 behaviors. They found that taurine and 5-amiovaleric acid (5AV) had significantly lower levels in ASD  
82 mice and could show that when feeding BTBR mice either taurine or 5AV, autism-like symptoms such  
83 as repetitive behavior and decreased social interaction could be decreased. In an intervention study,  
84 treatment with *Lactobacillus reuteri* has been shown to have beneficial effects on ASD-related social  
85 disturbances in mice [27]. In humans, intestinal microbiota transplantation has shown very promising  
86 results, both against gastrointestinal tract symptoms and ASD symptoms, granting the therapy a ‘fast-  
87 track’ status by the FDA [28]. Among the plasma metabolites showing average to good classification  
88 capacity between the treated children and the controls, sarcosine, tyramine O-sulfate and inosine 5’-  
89 monophosphate were selected as most discriminant [29]. Many of these studies postulate that  
90 microbiota-derived molecules are transported across the blood-brain-barrier, acting as neuroactive  
91 metabolites [22]. An impaired intestinal permeability or ‘leaky gut’ could also play a role in the effect  
92 of microbiota activity on psychiatric disorders [30,31]. If gut microbial metabolites of potential impact  
93 are indeed detectable in blood, this opens the door to blood-based investigations to further study and  
94 understand the metabolomic differences between ASD and non-ASD individuals in the context of gut-  
95 brain interactions.

96

97 Several studies have reported an altered metabolome associated with ASD during childhood, either in  
98 blood [32–35,25,36–44], urine [18,38,45–56] or other matrices [25,57]. However, although some  
99 biochemical biomarkers or set of biomarkers seem promising [6], none has yet been proven robust  
100 enough for clinical practice. Furthermore, it remains unclear at what point in life biochemical  
101 abnormalities of ASD are detectable.

102

103 To study the early role of genetic, prenatal and perinatal variables on disease development, samples  
104 need to be collected shortly after birth. However, it is not practically and ethically straightforward to  
105 draw blood from newborns prospectively. In many countries, the newborn screening programs are  
106 conducted on dried blood spots (DBS) collected a few days after birth. In Denmark, such DBS are  
107 stored in the Danish National Biobank and are available for research purposes for the last 30 years,  
108 thereby covering approximately half of the country's population [58]. This allows researchers to  
109 alleviate the biases inherent to recruitment in prospective clinical studies and instead retrospectively  
110 retrieve the samples that are connected to the relevant metadata stored in centralized health registries.

111

112 Taking advantage of this unique resource, we here aimed at studying the strengths and limitations of  
113 DBS samples in studying early biochemical abnormalities related to ASD development using an  
114 untargeted metabolomics protocol. We compared the metabolomic profiles of newborns that have been  
115 diagnosed with ASD at age 7 (cases) to newborns that have not (controls) and investigated potential  
116 main confounders.

117

## 118 **Methods**

### 119 **Materials and methods**

#### 120 *Materials*

121 Methanol (MeOH), acetonitrile (ACN), isopropanol (IPA), water (H<sub>2</sub>O) and formic acid (FA) were of  
122 Optima™ LCMS-grade and were purchased from Thermo Fisher Scientific (Waltham, MA, USA).  
123 Stable-isotope-labeled internal standards (IS) from the NeoBase Non-derivatized MSMS kit  
124 (PerkinElmer, Waltham, MA, USA) were used. The exact list of compounds is provided in Additional  
125 file 1.

126

### 127 *Subjects and samples*

128 Children (n=74) from the iPsych cohort [59] born in 2005 were randomly selected, of which 37 with a  
129 diagnosis of autism spectrum disorder (ICD10 F84.0, F84.1, F84.5, F84.8 and/or F84.9) [2] at the date  
130 of registry data extraction (2012), and 37 paired controls. Cases and controls were matched based on  
131 gender and date of birth. Other metadata such as gestational age (GA), birthweight, age at sampling,  
132 month of birth, mother's age at birth, and date of diagnosis, were also collected (when available).

133 Sample size was chosen for several reasons: 1) the unknown variation of metabolites in DBS made  
134 power calculations impossible, hence why we needed a pilot study, 2) batch effect is a common  
135 technical challenge in metabolomics, and analyzing all samples on one single 96-well plate was  
136 expected to reduce technical variability, 3) DBS are highly precious samples.

137 DBS are full blood from newborns, aged between 48 and 72 hours, blotted onto Ahlstrom #226 filter  
138 paper and left to dry for at least 3 hours at room temperature before being sent by mail at ambient  
139 temperature to the Department of Congenital Disorders at the Statens Serum Institut in Copenhagen.

140 Subsequent to being used in the newborn screening program the samples are biobanked in the Danish  
141 National Biobank ([www.nationalbiobank.dk](http://www.nationalbiobank.dk)) at -20°C until they are retrieved for further research  
142 analysis.

143

### 144 *Sample extraction*

145 A punch of 3.2-mm diameter was collected from each DBS using a Panthera-Puncher™ 9 blood spot  
146 punching system (PerkinElmer) directly into a MicroPlate, non-coated 96-well clear polystyrene plate  
147 (PerkinElmer). 100 µL of IS in extraction buffer were added to each well. The IS were labelled amino  
148 acids (AA IS) and acylcarnitines (AC IS) diluted in 80% methanol (i.e. dilution factor of 1:330,  
149 concentrations in Additional file 1). The plate was heat-sealed and shaken for 45 min at 750 rpm at  
150 25°C in a PHMP-4 incubator. Then it was centrifuged for 30 min at 4000 rpm at 4 °C.

151 All the transferring steps were performed on a Microlab STAR line automated liquid handling  
152 workstation using Venus software (Hamilton, Bonaduz, Switzerland).

153 The supernatant (75 µL) was transferred to a hard-shell 96-well polypropylene PCR plate (Bio-Rad)  
154 and dried down with nitrogen 60 L/min at 25 °C for 1 hour on an EVX-192 (Apricot Designs  
155 Evaporex). The residue was reconstituted in 75 µL 2.5% methanol, shaken for 15 min at 750 rpm at  
156 25°C in a PHMP-4 incubator, and centrifuged 10 min at 4000 rpm at 4 °C. 65µL were transferred to a  
157 hard-shell 96-well polypropylene PCR plate (Bio-Rad), heat-sealed, and centrifuged again for 5 min at  
158 3000 rpm at 4 °C. The method from sample preparation to MS acquisition is also available as a table  
159 according to the guidelines for standardization of LCMS method reporting [60] with adaptation to  
160 metabolomics (Additional file 1).

161

### 162 *Quality assurance*

163 LC-MS/MS instrument performance was controlled by analyzing 4 pooled extracts, 8 solvent blanks,  
164 and 3 paper blanks at regular intervals. Pooled extracts were made of 5 µL of reconstituted extract from  
165 each of the samples (cases and controls only, total of 370 µL divided in four wells spread across the  
166 plate) and were used to assess the consistency of extraction and data acquisition. Solvent blanks were  
167 used to check for carry over and instrument noise, while paper blanks were used to monitor matrix  
168 signals from the paper. Internal standards were used to control the quality of the extraction, elution, and

169 signal acquisition. Paired cases and controls were injected after one another but in a random order (first  
170 case, then control, or vice-versa). Pairs were randomized over the plate.

171

### 172 *Liquid chromatography*

173 The samples were injected using an autosampler with stack cooler (Open Autosampler UltiMate OAS-  
174 3300TXRS (Thermo Fisher Scientific)) and eluted through a Waters Acquity UPLC BEH C18 column  
175 (130 Å, 2.1 mm x 50 mm, 1.7-µm particles) preceded by a Waters Acquity UPLC BEH C18 VanGuard  
176 pre-column, 130 Å, 2.1 mm x 5 mm, 1.7-µm particles) using a Transcend II, LX-2 with UltiMate  
177 pumps (Thermo Fisher Scientific). The pressure limits were set at 0.0 – 1034.0 bar.

178 The mobile phase consisted of solvent A (97.31% H<sub>2</sub>O, 1.25% ACN, 1.25% MeOH and 0.2% FA), and  
179 B (2.49% H<sub>2</sub>O, 48.66% ACN, 48.66% MeOH and 0.2% FA).

180

181 The Wash1 solvent was mobile phase A and the Wash2 solvent mix was 25:25:25:25 v/v  
182 MeOH:IPA:H<sub>2</sub>O:ACN + 0.2% FA. The gradient (0.25 mL/min) started with 100% A : 0% B. After 0.5  
183 min, we applied a gradient ramp to 0% A: 100% B over 8.5 minutes followed by a 0.5-min flow ramp  
184 up to 0.9 mL/min and 5 minutes of 100% B. At 15 min, the column was equilibrated for 5.5 min with  
185 100% A. At 17.5 min, the flow was changed back to 0.25 mL/min over 0.5 min. The total run time was  
186 20.5 minutes, including 10 min sample run time and 10.5 min column wash and equilibration. The  
187 column temperature was maintained at 60.0°C using a hot pocket column heater and the samples in the  
188 autosampler were kept at 4°C throughout the analysis. The data was acquired in profile mode from 0.20  
189 min and over 9.80 min.

190

### 191 *Mass spectrometry*



192 The Q-Exactive Orbitrap mass spectrometer (Thermo Fisher Scientific) was operated with a heated  
193 electrospray ionization source (HESI) in positive mode. The instruments were controlled using  
194 TraceFinder 4.1 Clinical Research and Aria MX (Thermo Fisher Scientific). Mass range in MS full  
195 scan mode was set to 70 to 1050  $m/z$  with a resolution of 35,000. Automatic gain control was set to  
196  $1.10^6$ , and maximum injection time at 100 ms. For data dependent-MS2 the resolution was set to  
197 17,500. Automatic gain control was set to  $1.10^5$ , and maximum injection time at 50 ms. Loop count  
198 was 5, isolation window 1.5  $m/z$  and the stepped NCE 17.5, 35 and 52.5 eV. The spectrum data type  
199 was set to Profile. In data dependent settings the Apex trigger was set to 2 to 7 s with 15s dynamic  
200 exclusion and charge exclusion on 3-8 and >8. Diisooctylphthalate (391.28429  $m/z$ ) was selected as  
201 lock mass. Other settings included the sheath gas pressure ( $N_2$ , 32 psi), the auxiliary gas flow and  
202 temperature ( $N_2$ , 8 arb. units, 350°C), the S-lens radio frequency level (50.0%), the ion source  
203 temperature (350°C), and the spray voltage (3.8 kV between 0-9.8 min and 1.0 kV between 9.8-10  
204 min).

205

#### 206 *LC-MS data preprocessing*

207 After conversion to .mzML (centroid) using MSConvertGUI v3.0 (ProteoWizard Software Foundation,  
208 Palo Alto, CA, USA) [61], raw files were pre-processed using MZmine v2.41.2 [62,63]. All setting  
209 details are provided in the batch .xml file (Additional file 2). Briefly, data were cropped based on  
210 retention time (RT) 0.27-9.80 min. Masses were detected with a noise threshold of 10,000 for MS1 and  
211 of 0 for MS2. The chromatogram was built using the ADAP module [64], with minimum 7 scans per  
212 peak, a group intensity threshold of 10,000, a minimum highest intensity of 150,000, and a  $m/z$   
213 tolerance of 0.001  $m/z$  or 5 ppm. Deconvolution was performed using the Wavelets (ADAP) module,  
214 with  $m/z$  center calculation using median, and ranges for MS2 scan pairing of 0.01 Da and 0.4 min. The  
215 isotopes were grouped with a  $m/z$  tolerance of 0.001  $m/z$  or 5 ppm and RT tolerance of 0.1 min. Peaks

216 were aligned with a  $m/z$  tolerance of 0.001  $m/z$  or 5 ppm and RT tolerance of 0.1 min, with 75% weight  
217 given to  $m/z$  and 25% to RT. Finally, peaks were filtered with a minimum of fifteen peaks in a row, and  
218 the same RT and peak duration ranges as previously applied. The feature quantification table (.csv) and  
219 aggregated MS2 masses list (.mgf) were exported (no merging of MS/MS and filter rows: ALL) for  
220 further analysis.

221

### 222 *Feature-based molecular networking using GNPS and compound annotation*

223 A molecular network was created with the feature-based molecular networking workflow ([https://ccms-](https://ccms-ucsd.github.io/GNPSDocumentation/featurebasedmolecularnetworking/)  
224 [ucsd.github.io/GNPSDocumentation/featurebasedmolecularnetworking/](https://ccms-ucsd.github.io/GNPSDocumentation/featurebasedmolecularnetworking/)) [65] on the GNPS website  
225 (<http://gnps.ucsd.edu>) [66] by uploading the aggregated MS2 mass list. The data was filtered by removing  
226 all MS/MS fragment ions within +/- 17 Da of the precursor  $m/z$ . MS/MS spectra were window filtered  
227 by choosing only the top 6 fragment ions in the +/- 50Da window throughout the spectrum. The precursor  
228 ion mass tolerance was set to 0.02 Da and a MS/MS fragment ion tolerance of 0.02 Da. A network was  
229 then created where edges were filtered to have a cosine score above 0.7 and more than 4 matched peaks.  
230 Further, edges between two nodes were kept in the network if and only if each of the nodes appeared in  
231 each other's respective top 10 most similar nodes. Finally, the maximum size of a molecular family was  
232 set to 100, and the lowest scoring edges were removed from molecular families until the molecular family  
233 size was below this threshold. The spectra in the network were then searched against GNPS' spectral  
234 libraries. The library spectra were filtered in the same manner as the input data. All matches kept between  
235 network spectra and library spectra were required to have a score above 0.7 and at least 4 matched peaks.  
236 The .graphml network file was then visualized using Cytoscape v3.7.2 [67] where individual sample data  
237 and metadata were locally plotted (per sample and metadata sample group relative intensities). To  
238 enhance annotation of potential compounds of interest using the mzCloud spectral library (Thermo Fisher  
239 Scientific), .raw files were also preprocessed using Compound Discoverer 2.1 (CD2.1) SP1 software

240 (Thermo Fisher Scientific). Details regarding the settings are provided in Additional file 3. GNPS and  
241 Compound Discoverer (annotation reported when above mzCloud 80% confidence in identity or  
242 similarity search) offer annotations with a level 2 confidence according to the Metabolomics Standards  
243 Initiative (i.e. putative annotation) [68,69]. To summarize and further enhance chemical structural  
244 information within the molecular network, substructure information ([https://ccms-  
245 ucsd.github.io/GNPSDocumentation/ms2lda/](https://ccms-ucsd.github.io/GNPSDocumentation/ms2lda/)) [70], information from *in silico* structure annotations from  
246 Network Annotation Propagation [71] and Dereplicator [72] were incorporated using the GNPS  
247 MolNetEnhancer workflow (<https://ccms-ucsd.github.io/GNPSDocumentation/molnetenhancer/>) [73]  
248 with chemical class annotations retrieved from the ClassyFire chemical ontology [74]. When no chemical  
249 structural information could be retrieved through the above searches, the MS/MS spectra were  
250 additionally searched via MASST [75] and SIRIUS+CSI:FingerID [76–78]. MASST allows to query a  
251 single MS/MS spectrum across all public GNPS datasets giving an idea of the type of samples or matrices  
252 where the same MS/MS spectrum has been detected [75]. SIRIUS+CSI:FingerID uses deep learning  
253 algorithms to predict the molecular and structural formula of a molecule from MS/MS spectra [76–79].

254

### 255 *Contamination filtering and further data curation*

256 Using a Kendrick Mass Filter, we explored the compositionality of our data to assess the potential  
257 presence of undesired chemical background [80]. Out of the 4,360 features obtained through MZmine  
258 preprocessing, more than 1,100 possessed repeat units typical of polyethylene glycol (PEG) and  
259 polypropylene glycol (PPG). Filtering of PEG followed by filtering of PPG was performed using a  
260 Kendrick Mass Filter [80] with the following parameters: number of observed signals = 5, Kendrick  
261 mass defect = 0.01, and fraction base = 1 (see Additional file 4AB).

262 Of the 3,253 remaining features, we further excluded those with a maximum intensity in paper blanks /  
263 maximum intensity in samples ratio  $\geq 0.2$ , as well as features with 20% or more gaps (i.e. missing  
264 value) in cases and/or in controls (1,975 features filtered).

265

### 266 *Data visualization and outlier handling*

267 We performed principal coordinates analyses (PCoA) to visualize the data in an interactive 3D-space  
268 using EMPEROR within QIIME 2 [81,82] using the Bray-Curtis, Canberra, Robust Aitchison [83] and  
269 Jaccard distance metrics. This tool allowed us to easily map metadata on each sample in the 3D-space  
270 and quickly detect broad patterns in the data, such as assessing the consistency of repeated pool  
271 injections (i.e. repeated injections of the same pooled samples should cluster in PCoA space). When  
272 performing these calculations on our “raw” unfiltered feature table (4,360 features), all tested distance  
273 metrics showed seven samples as clear outliers, of which two controls and five cases. After  
274 contamination filtering and data curation (1,281 features), six outliers remained since one outlier  
275 (control) was due to PEG contamination. Among the investigated potential explanations for these  
276 outliers, no pattern was found when looking at: position on the plate layout, potential RT shift  
277 impairing the alignment, and metadata. However, targeted analysis of labeled internal standards and  
278 unlabeled endogenous homologs showed that significant (but unexplained) errors occurred during  
279 LCMS acquisition, with many undetectable compounds (TraceFinder 4.1 Clinical Research, Thermo  
280 Fischer Scientific) (Additional file 5). A heatmap representation of the data (1,281 features) using  
281 MetaboAnalyst 4.0 [84] confirmed the six outliers with very low intensities (Additional file 5).  
282 Therefore, we decided to exclude these outliers from further statistical analyses and reran the PCoA  
283 calculations on the remaining 68 samples.

284

### 285 *Statistics*

286 Using the calculated distance matrices from the PCoAs (1,281 features, 68 samples), we performed  
287 Permutational Multivariate Analyses of Variance (PERMANOVAs) [85] to assess how much of the  
288 variance in the data is explained by a certain variable in the metadata. We investigated the following  
289 variables: autism (yes/no), autism subtype, gender, birthweight, gestational age, age at sampling, month  
290 of birth, and injection order. The Adonis  $R^2$  value indicates to what extent the variance is explained by  
291 the tested variable. Significance threshold was set at 0.05. Calculations were performed using the *vegan*  
292 and *ggplot2* packages in R software v3.6.1 [86].  
293 Finally, the curated dataset (1,281 features, 68 samples, unpaired samples) was processed using  
294 MetaboAnalyst 4.0 [84]. We excluded features with more than 50% missing values and replaced the  
295 remaining missing values by a small value (half the minimum positive value in the original data). We  
296 further filtered non-informative near-constant features based on interquartile range and applied a glog  
297 transformation and Pareto scaling. We used a fold-change threshold of 2 (case/control or control/case)  
298 and performed t-test and Wilcoxon rank-sum test with FDR correction for multiple comparisons. We  
299 could not reliably use the Partial Least Squares Discriminant Analysis (negative Q2 in cross  
300 validation). All Jupyter notebooks used for statistical analysis are publicly available on github  
301 ([https://github.com/madeleineernst/Autism\\_SupplementaryMaterial](https://github.com/madeleineernst/Autism_SupplementaryMaterial)).

302

## 303 **Results**

### 304 *Subjects*

305 Subjects' characteristics are presented in Table 1 (details in Additional file 6). Cases and controls were  
306 similar in terms of GA, birthweight, age at sampling and age of their mother at birth. The most  
307 prevalent autism subtype was childhood autism. Most cases had only one diagnosis, but six had both  
308 unspecified pervasive development disorder and autism (either childhood autism or atypical autism).

309 None had more than two diagnoses. Median age at first diagnosis was 5.6 years (range 1.1-7.8). Most  
310 subjects were born at term (GA  $\geq$  38 weeks). Only three cases and two controls were born preterm.

311

312 [Table 1]

313

### 314 *Molecular Network analysis*

315 From all features for which a MS2 spectrum has been acquired (2217 features over 4360) a feature-  
316 based molecular network was computed via GNPS. Annotation could be retrieved for 150 features  
317 (3.4%) of which 103 by matching to GNPS libraries (annotation level 2), and 47 by matching to our in-  
318 house library using Trace Finder (annotation level 1, Additional file 7). Using the MolNetEnhancer  
319 workflow [73], putative chemical structural information at the chemical class level, corresponding to a  
320 level 3 annotation, could be retrieved for an additional 859 features. Hence, nearly 46% (1009) of the  
321 mass spectral features could be putatively annotated at a level 1 to 3 (Additional file 7). Annotation  
322 covered 31 chemical classes including 53 subclasses and 116 direct parents, such as medium-chain  
323 fatty acids, phosphatidylcholines, nucleotides, amino acids, bile acids, steroids, acyl carnitines and  
324 catecholamines.

325 Molecular families (independent clusters of nodes) from the 15 predominant putatively annotated  
326 chemical classes are presented in Figure 1 (see details in Additional file 7). Plotting the average  
327 intensities in the three groups (cases, controls, paper blanks) as well as fold change values (or p-values)  
328 on the network nodes allowed for a quick overview of the molecular families with potential biological  
329 relevance (See the example of bile acids in Figure 2). This analysis showed the potential of DBS in  
330 covering various chemical classes and the power of feature-based molecular network analyses and  
331 related metabolome mining tools in expanding the interpretability of complex untargeted metabolomics  
332 data.

333

334 *Statistical analyses*

335 In PCoA space, repeated pool injections clustered satisfactorily showing that the LC-MS/MS data  
336 acquisition was of acceptable quality (Figure 3). When looking at the two groups (cases/controls), no  
337 clear separation was observed, even after removal of outliers (Figure 3A) and on all tested distance  
338 metrics.

339 The PERMANOVAs (Figure 4, Additional file 8) revealed that the variance in the data was not  
340 significantly explained by the grouping (cases/controls) (Bray-Curtis Adonis  $R^2 = 0.014$ , P-value =  
341 0.777), even when distinguishing subtypes of ASD, although subtypes had a higher Adonis  $R^2$  (Bray-  
342 Curtis Adonis  $R^2 = 0.070$ , P-value = 0.707, see Table 1 for details on subtypes of ASD). Similarly, the  
343 gender and birthweight did not significantly explain the variance in the data. However, variation in the  
344 data explained by gestational age (Bray-Curtis Adonis  $R^2 = 0.034$ , P-value = 0.028), age at sampling  
345 (Bray-Curtis Adonis  $R^2 = 0.053$ , P-value = 0.002) and especially month of birth (Bray-Curtis Adonis  
346  $R^2 = 0.262$ , P-value = 0.001, see Figure 3B) was significant, and to an increasing extent respectively  
347 (greater Adonis  $R^2$ ). On a technical level, we also observed a significant effect of injection order on the  
348 data variation (Bray-Curtis Adonis  $R^2 = 0.047$ , P-value = 0.002), pointing to a limitation in our LC-  
349 MS/MS method.

350

351 Results of univariate analyses and fold change analysis were carefully scrutinized feature by feature.  
352 Considering our small sample size and potential pitfalls inherent to untargeted metabolomics related to  
353 contaminants or integration errors, we thought essential to inspect each result to eliminate false  
354 positives and spurious findings. Our inspection consisted of a five-step logic starting with peak  
355 integration and shape quality (MZmine). We then plotted all individual intensity values to assess  
356 whether the case/control difference was driven by four or fewer samples. If not, we reported the extent

357 of missing values in each group, checked the consistency of replicated pool injections, and finally  
358 checked whether the feature was present in the feature-based molecular network, annotated as a  
359 contaminant or in a node cluster with such annotation (Additional file 9). A large proportion of the  
360 inspected features were excluded based on these criteria, showing the importance of such a verification  
361 in order not to pursue spurious findings in future studies.

362 Among the 24 features with a fold change (case/control) value  $<0.5$  or  $>2.0$ , only one passed manual  
363 inspection (Table 2, the full table is in Additional file 9). Eluting quite late (RT = 6.64 min, ID8605),  
364 this relatively hydrophobic compound had a detected  $m/z$  of 1014.4892 and was not connected to any  
365 other node in the network analysis (see its mass spectrum in Additional file 10). It could not be  
366 annotated, but the algorithm of SIRIUS+CSI:FingerID pointed at a raw formula of  $C_{36}H_{63}N_{21}O_{14}$   
367 ( $[M+H]^+$ , only 7.12% scoring). This compound was more than twice as intense in controls as in cases  
368 (FC 0.42, average intensity in cases  $2.73E+05$  and controls  $7.51E+05$ ), and would need further  
369 investigation, especially as it was not detected in many samples (Additional file 9). A MASST search  
370 was performed, however the feature with  $m/z$  1014.4892 was not found in any of the public datasets on  
371 GNPS.

372

373 [Table 2]

374

375 No feature was significantly differentially abundant in cases and controls according to the univariate  
376 analyses with FDR correction for multiple comparisons (p values in Table 2).

377 Features that were differentially abundant before FDR correction are presented in Table 2. As a high  
378 proportion of features were deemed irrelevant after inspection, we are presenting only the two relevant  
379 features that passed our quality-control criteria. The full list and inspection details can be found in  
380 Additional file 9. Methacholine was found to be significantly more abundant in cases when compared



381 to controls (average intensity in cases 4.41E+07 and controls 3.94E+07) both when using a t-test ( $p =$   
382 0.0021) and a Wilcoxon rank-sum test ( $p = 0.0031$ ). The corresponding node (ID159) in the network  
383 analysis was connected to another node with a mass difference of  $-0.036 m/z$  (225 ppm) which could  
384 not be annotated. None of the applied metabolome mining tools was able to retrieve chemical structural  
385 information for the second compound significantly more abundant in cases than in controls (ID5593,  
386  $m/z$  1014.4892, average intensity in cases 5.71E+05 and controls 4.35E+05). SIRIUS+CSI:Finger ID  
387 predicted a molecular formula of  $C_{11}H_{22}N_2O_3$  (M+H<sup>+</sup>, 99.96% scoring). Its RT of 2.78 min could  
388 indicate a medium polarity with a logP between -1.0 and 0.5 when compared to tryptophan (RT 2.56  
389 min, HMDB experimental logP -1.06) and hippuric acid (RT 3.04 min, HMDB experimental logP  
390 0.31).

391 Among the 273 compounds reported in two recent reviews [6,87], 22 were cited at least three times, of  
392 which 18 could be linked to features in our study after manual verification (Table 3, Additional file 11).

393

394 [Table 3]

395

## 396 **Discussion**

397 To assess the early signs of ASD development shortly after birth, we compared DBS samples from  
398 newborns that have later on been diagnosed with ASD to newborns that have not. Our pilot study  
399 showed the capacity of untargeted metabolomics as an analytical tool applied to biobanked DBS  
400 samples to cover several metabolites relevant to ASD, thus suggesting that biochemical markers of  
401 ASD are present at birth and could be targeted during neonatal screening. In addition, our method  
402 pinpointed other factors which have a strong influence on the metabolic profile of newborn DBS, such

403 as gestational age, age at sampling and month of birth, and which are important to consider when  
404 designing metabolomic studies in neonatal, biobanked DBS.

405 One study from 2013 was performed on newborn DBS samples from 16 autistic children and assessed  
406 90 biomarkers (not only small molecules) using immunoassays [88] of which three sets of five were  
407 associated with ASD. Another study was performed on DBS but in ASD children (n=83, age 2-10  
408 years) and was targeting 45 metabolites [37], of which 9 were significantly higher in ASD children.  
409 However, the potential of DBS in *untargeted* metabolomics studies has not yet been fully studied, and  
410 never in the context of ASD (see recent reviews [6,87]).

411 Among the 22 compounds that had been repeatedly ( $\geq 3$  times) reported in the literature to be involved  
412 in ASD, 18 could be putatively annotated in our study, showing that our analytical pipeline covers  
413 many relevant metabolites, including some specific to gut microbiota activity. Despite thorough  
414 curation and inspection of the acquired data, no feature was significantly differentially abundant in  
415 cases and controls after FDR correction. The small sample size as well as strong confounders could  
416 play a role in the low power of this pilot study. Nonetheless, the PERMANOVA results showed that  
417 subtypes of autism seemed to explain more variance in the data than just the case/control division  
418 (higher Adonis  $R^2$ , Figure 4). This could mean that subtypes have indeed distinct biochemical profiles  
419 and should maybe be considered separately or in a stratified manner. Although, the lack of significance  
420 could suggest that ASD genetic, prenatal and/or perinatal variables do not (sufficiently) translate into  
421 biochemical abnormalities in newborns or that these are not detectable in biobanked DBS using our  
422 current experimental setup, we were able to pinpoint 18 out of 22 metabolic markers associated with  
423 ASD in previous studies. This finding suggests that rather the sample size and confounders are  
424 responsible for the absent signal observed here, and future studies controlling for the here identified  
425 confounders and greater sample size could provide more answers.

426

427 Among the hits and interesting findings of our pilot, we could show that a methacholine structural  
428 analogue could be a relevant marker for ASD, as it was found at a higher although not significant  
429 abundance in newborns that have been diagnosed with ASD at age 7. Methacholine is a choline ester  
430 drug acting as non-selective muscarinic receptor agonist. It is mainly known as methacholine chloride  
431 for its use in assessing bronchial hyper-reactivity in asthmatic patients. Although muscarinic receptors  
432 were not associated with autism in children [89], lower estimates of ASD risk among children exposed  
433 during fetal life to muscarinic receptor 2 agonists were reported [90]. Higher abundance of  
434 methacholine in DBS of ASD cases, as seen in our study, would therefore not be easily explained and  
435 demand further investigation. However, detecting a drug metabolite such as methacholine in newborn  
436 samples is unexpected, thus it is more likely that this feature is an endogenous choline ester with  
437 similar fragmentation behavior to methacholine.

438

439 Two other unknown features would benefit from being monitored in future studies. One relatively  
440 hydrophobic compound (ID8605,  $m/z$  1014.4892) showed an important fold change (much lower in  
441 cases) but was not detected in many samples maybe due to low intensities. The second compound  
442 (moderately polar, ID5593,  $m/z$  1014.4892,  $C_{11}H_{22}N_2O_3$ ) was significantly higher in cases before FDR  
443 correction and detected in more than 65% of samples. Including both in an inclusion list for optimized  
444 MS2 acquisition could provide higher quality spectra for better annotation. Overall, we observed poor  
445 fragmentation of some analytes (4 fragmentation peaks or less) and optimization of fragmentation  
446 parameters to a few targeted compounds, could enable better chemical structural annotation, although  
447 fragmentation parameters such as other technical and sample preparation parameters, can never be  
448 optimized for all compounds equally.

449

450 Although our study was not designed specifically to assess the tested confounders, we have shown that  
451 gestational age, age at sampling and month of birth are strong drivers of metabolomic profiles in  
452 newborns. This demonstrates the importance of considering these confounders when designing a future  
453 study in newborn DBS.

454

455 Prematurity has been involved in numerous adverse health outcomes [91] and metabolic maturity has  
456 been shown to be reflected in the blood and other matrices of infants after birth [92,93]. Although, in  
457 the present study, only three cases and two controls were premature (<38 weeks of gestational age), we  
458 saw a significant effect of gestational age on the metabolomic profile of newborns thus showing that  
459 gestational age is an important factor to be controlled for in newborn DBS studies.

460

461 Similarly, we found that age at sampling has a significant impact on the newborn blood metabolome.  
462 From 3 to 10 days of age, only one week has passed, and yet fundamental metabolic changes occur in  
463 the newborn who is not anymore connected to his/her mother's blood, but exposed to various types of  
464 nutrition and environmental conditions (healthcare, hospital vs home, etc.). The endogenous  
465 anabolism/catabolism balance is in itself a strong variable to consider at that age. From 2009 onwards,  
466 the Danish newborn screening program has indeed chosen to standardize the age at DBS sampling to  
467 48 to 72 hours to optimize the window where potential inborn errors of metabolism would be detected  
468 best and as early as possible since quick intervention is essential in such cases [94]. The iPsych cohort  
469 was based on diagnoses of psychiatric disorders recorded in Danish health registry in 2012 [59]. Such  
470 diagnoses are often given after several years of age, which is why the cohort did not cover subjects  
471 born after 2005, year at which the age at sampling was not so narrowly standardized. The large sample  
472 size of the iPsych cohort (almost 15,000 cases of ASD) should however allow for stricter selection  
473 criteria in our future studies.

474

475 Another major change that occurs in newborns at birth and in the following days is the gut maturation  
476 and its further colonization by microbes [95]. This topic has been under expanding attention in the last  
477 decade, and the development and involvement of gut microbiota in neurodevelopment is being  
478 scrutinized extensively [22]. The exact dynamics of the microbiota development in the placenta and  
479 during the first days of life is still uncertain [95–97], as well as to what extent its activity can be  
480 reflected in the blood. A recent study has shown that gut microbial alpha-diversity can be predicted  
481 from the human blood metabolome [98] suggesting that microbial metabolites  
482 explain a significant amount of the variance in the human blood metabolome. Thus, although sampled  
483 at an early stage in life, it is plausible that microbial metabolites mediating health may be found in  
484 dried blood spots from newborns [93]. Studying both fecal and blood samples will be essential to  
485 answer questions related to the impact of gut microbes on the gut-brain axis, especially in the context  
486 of psychiatric disorders where the brain is the main organ concerned but indeed located quite far from  
487 the gut. Microbial metabolites would necessarily need to travel in the blood (or lymph) and through the  
488 blood-brain barrier to interact with the brain. In our study, some detected metabolites could partly  
489 derive from gut microbiota activity such as DL-Indole-3-lactic acid (ID3461, [99,100]), taurine (ID428,  
490 level 3, [25]), various bile acids (Additional file 7, [57]), or inosine 5'-monophosphate (ID1133, level  
491 3, [29]).

492

493 Lastly, we found that month of birth explains a significant variation in metabolomic profiles of  
494 newborns (Figure 3b, Figure 4). Whether there is a yearly cyclic pattern or whether our findings are  
495 specific to 2005 remains to be determined. Explanations could include aspects related to pregnancy  
496 conditions varying along the year such as diet, weather conditions and sun exposure (e.g. impact on  
497 vitamin D levels, type and extent of physical and social activities, mood and stress [101]), exposure to

498 “seasonal” infectious diseases (e.g. influenza), exposure to varying air quality (e.g. pollution or pollens  
499 [102]), as well as storing conditions which might fluctuate over the year (e.g. sample transport at higher  
500 temperatures during summer).

501

502 Gender and birthweight were not found to explain a significant part of the variance in the metabolomic  
503 profiles of newborns in our study, despite the obvious connection between gestational age and  
504 birthweight. The gender misbalance which reflects the gender disparity in ASD (a quarter were girls),  
505 non-dedicated design, and small sample size could explain this finding. Some studies have indeed  
506 reported that the profile of newborn girls and boys differed in, for instance, blood amino acids and  
507 acylcarnitines [103], as well as urine profiles [104]. Despite our finding, we believe that gender and  
508 birthweight should be adjusted for and taken into consideration when designing metabolomics studies  
509 in newborns. Several of the tested confounders are inter-connected with, for instance, reports of more  
510 males being born preterm [105] and females being born lighter [106], both associations being explained  
511 by mechanisms that are likely to be reflected in the metabolome such as inflammatory response and  
512 insulin resistance, respectively.

513

514 On the technical side, the strong effect of injection order is again a reminder that randomizing sample  
515 pairs on the plates is fundamental in untargeted metabolomics. Although technical improvements can  
516 be considered, it is extremely difficult if not impossible to avoid some level of signal drift and  
517 carryover in untargeted metabolomics studies[107].

518

### 519 **Limitations and strengths**

520 To avoid batch effect and minimize the use of highly valuable and rare samples, we analyzed only 37  
521 pairs of cases and controls in this pilot study. Despite the small sample size that did not confer enough

522 statistical power for pinpointing strong marker metabolites of ASD, we could detect numerous  
523 metabolites associated with ASD in previous studies and identify a number of confounders to be  
524 considered in future untargeted metabolomics study using newborn DBS. Other confounders not  
525 evaluated in our study will need to be assessed in future studies, including metabolic changes in DBS  
526 associated with time and storage conditions. Hematocrit variation could not be measured in our study  
527 as we had access to only one punch of paper and did not have the possibility to measure a surrogate  
528 marker such as potassium [108]. Furthermore, metabolites detected in this study are inherently  
529 reflective of sampling protocols, including extraction protocols and MS acquisition parameters and  
530 should be interpreted within these limitations.

531

## 532 **Conclusions**

533 This is the first study assessing metabolomic profiles of a psychiatric disorder, ASD in biobanked,  
534 newborn DBS samples. The development of biobanks and reuse of systematically collected DBS  
535 samples for research purposes in connection with registry data represent many new opportunities to  
536 study the physiopathology and early signs of diseases, with extraordinary impacts in prevention,  
537 diagnosis and treatment strategies. We showed that untargeted metabolomics on DBS samples offers a  
538 wide and relevant coverage of metabolites for the study of ASD and that the new processing tools used  
539 in our method largely expand the interpretability of such complex data.

540

## 541 **Declarations**

- 542 • Ethics approval and consent to participate

543 The Danish ethical committee approved the project (1-10-72-287-12). All blood samples can be stored  
544 without explicit informed consent according to Danish law, and be reused for additional analysis

545 provided that projects are approved by the Research Ethics Committee and the Danish Data Protection  
546 Agency. Although research projects require informed consent, the Research Ethics Committee can  
547 waive this requirement if samples are anonymously processed, and if the projects do not imply any  
548 health-related risk or burden to the subjects [109].

549

- 550 • Consent for publication

551 Not applicable

552

- 553 • Availability of data and materials

554 The datasets generated and/or analyzed during the current study are not publicly available due to the  
555 risk of compromising individual privacy but are available from the corresponding author on reasonable  
556 request and provided that an appropriate collaboration agreement can be agreed upon.

557

- 558 • Competing interests

559 The authors declare that they have no competing interests.

560

- 561 • Funding

562 This study was funded by The Lundbeck Foundation, Denmark.

563 This research has been conducted using the Danish National Biobank resource supported by the Novo  
564 Nordisk Foundation grant number is 2010-11-12 and 2009-07-28.

565

566 *Disclaimer*

567 This funder had no involvement in any aspect of the study.

568



569 *Grant number*

570 R248-2017-2003 - Period III: 1 March 2018 - 28 February 2021

571 R155-2014-1724: Period II: 1 March 2015 – 28 February 2018

572 R102-A9118: Period I: 1 March 2012 – 28 February 2015

573

574 • Authors' contributions

575 JC and AC designed the study.

576 SSL collected the samples and ran the metabolomics analyses.

577 ME defined and coded major steps of data processing, chemical structural annotation and statistical  
578 analysis and edited the manuscript.

579 JC processed the data, performed statistical analyses, and drafted the manuscript.

580 JC, ME, SSL and AC were involved in the manuscript edition and data interpretation, critically revised  
581 the manuscript for important intellectual content, and approved the final version of this manuscript.

582 JC and AC had full access to all the data in the study and take responsibility for the integrity of the data  
583 and the accuracy of the data analysis.

584

585 • Acknowledgements

586 We thank Anders Björkbom for his major contribution to the LCMS method development and Marie  
587 Bækvad-Hansen for her help in curating data.

588

589 • Authors' information (optional)

590 Not applicable

591

592

## 593 **References**

594 1. Randall M, Egberts KJ, Samtani A, Scholten RJ, Hooft L, Livingstone N, et al. Diagnostic tests for autism  
595 spectrum disorder (ASD) in preschool children. *Cochrane Database Syst Rev.* 2018;

596 2. World Health Organization. *The ICD-10 classification of mental and behavioural disorders: diagnostic criteria*  
597 *for research.* Geneva: World Health Organization; 1993.

598 3. Adam D. Mental health: On the spectrum. *Nat News.* 2013;496:416.

599 4. Frances A. ICD, DSM and The Tower of Babel. *Aust N Z J Psychiatry.* 2014;48:371–3.

- 600 5. Bejarano-Martín Á, Canal-Bedia R, Magán-Maganto M, Fernández-Álvarez C, Cilleros-Martín MV, Sánchez-  
601 Gómez MC, et al. Early Detection, Diagnosis and Intervention Services for Young Children with Autism  
602 Spectrum Disorder in the European Union (ASDEU): Family and Professional Perspectives. *J Autism Dev*  
603 *Disord.* 2019;
- 604 6. Shen L, Liu X, Zhang H, Lin J, Feng C, Iqbal J. Biomarkers in autism spectrum disorders: Current progress.  
605 *Clin Chim Acta Int J Clin Chem.* 2019;502:41–54.
- 606 7. Bai D, Yip BHK, Windham GC, Sourander A, Francis R, Yoffe R, et al. Association of Genetic and  
607 Environmental Factors With Autism in a 5-Country Cohort. *JAMA Psychiatry.* 2019;76:1035–43.
- 608 8. Grove J, Ripke S, Als TD, Mattheisen M, Walters RK, Won H, et al. Identification of common genetic risk  
609 variants for autism spectrum disorder. *Nat Genet.* 2019;51:431–44.
- 610 9. Newschaffer CJ, Croen LA, Daniels J, Giarelli E, Grether JK, Levy SE, et al. The epidemiology of autism  
611 spectrum disorders. *Annu Rev Public Health.* 2007;28:235–58.
- 612 10. Hannon E, Schendel D, Ladd-Acosta C, Grove J, Hansen CS, Andrews SV, et al. Elevated polygenic burden  
613 for autism is associated with differential DNA methylation at birth. *Genome Med.* 2018;10.
- 614 11. Braam W, Ehrhart F, Maas APHM, Smits MG, Curfs L. Low maternal melatonin level increases autism  
615 spectrum disorder risk in children. *Res Dev Disabil.* 2018;82:79–89.
- 616 12. Abbott PW, Gumusoglu SB, Bittle J, Beversdorf DQ, Stevens HE. Prenatal stress and genetic risk: How  
617 prenatal stress interacts with genetics to alter risk for psychiatric illness. *Psychoneuroendocrinology.* 2018;90:9–  
618 21.
- 619 13. Fine R, Zhang J, Stevens HE. Prenatal stress and inhibitory neuron systems: implications for  
620 neuropsychiatric disorders. *Mol Psychiatry.* 2014;19:641–51.
- 621 14. Croen LA, Qian Y, Ashwood P, Zerbo O, Schendel D, Pinto-Martin J, et al. Infection and Fever in  
622 Pregnancy and Autism Spectrum Disorders: Findings from the Study to Explore Early Development. *Autism*  
623 *Res.* 2019;12:1551–61.
- 624 15. Kuzniewicz MW, Wi S, Qian Y, Walsh EM, Armstrong MA, Croen LA. Prevalence and Neonatal Factors  
625 Associated with Autism Spectrum Disorders in Preterm Infants. *J Pediatr.* 2014;164:20–5.
- 626 16. Apgar V. A proposal for a new method of evaluation of the newborn infant. *Curr Res Anesth Analg.*  
627 1953;32:260–7.
- 628 17. Modabbernia A, Sandin S, Gross R, Leonard H, Gissler M, Parner ET, et al. Apgar score and risk of autism.  
629 *Eur J Epidemiol.* 2019;34:105–14.
- 630 18. Alberti A, Pirrone P, Elia M, Waring RH, Romano C. Sulphation deficit in “low-functioning” autistic  
631 children: a pilot study. *Biol Psychiatry.* 1999;46:420–4.
- 632 19. Chaidez V, Hansen RL, Hertz-Picciotto I. Gastrointestinal problems in children with autism, developmental  
633 delays or typical development. *J Autism Dev Disord.* 2014;44:1117–27.
- 634 20. Krajmalnik-Brown R, Lozupone C, Kang D-W, Adams JB. Gut bacteria in children with autism spectrum  
635 disorders: challenges and promise of studying how a complex community influences a complex disease. *Microb*  
636 *Ecol Health Dis.* 2015;26.

- 637 21. White JF. Intestinal pathophysiology in autism. *Exp Biol Med* Maywood NJ. 2003;228:639–49.
- 638 22. Cerdó T, Diéguez E, Campoy C. Early nutrition and gut microbiome: interrelationship between bacterial  
639 metabolism, immune system, brain structure, and neurodevelopment. *Am J Physiol-Endocrinol Metab*.  
640 2019;317:E617–30.
- 641 23. Wang S, Harvey L, Martin R, van der Beek EM, Knol J, Cryan JF, et al. Targeting the gut microbiota to  
642 influence brain development and function in early life. *Neurosci Biobehav Rev*. 2018;95:191–201.
- 643 24. De Angelis M, Francavilla R, Piccolo M, De Giacomo A, Gobbetti M. Autism spectrum disorders and  
644 intestinal microbiota. *Gut Microbes*. 2015;6:207–13.
- 645 25. Sharon G, Cruz NJ, Kang D-W, Gandal MJ, Wang B, Kim Y-M, et al. Human Gut Microbiota from Autism  
646 Spectrum Disorder Promote Behavioral Symptoms in Mice. *Cell*. 2019;177:1600-1618.e17.
- 647 26. Kelly RS, Boulin A, Laranjo N, Lee-Sarwar K, Chu SH, Yadama AP, et al. Metabolomics and  
648 Communication Skills Development in Children; Evidence from the Ages and Stages Questionnaire.  
649 *Metabolites*. 2019;9:42.
- 650 27. Sgritta M, Dooling SW, Buffington SA, Momin EN, Francis MB, Britton RA, et al. Mechanisms Underlying  
651 Microbial-Mediated Changes in Social Behavior in Mouse Models of Autism Spectrum Disorder. *Neuron*.  
652 2019;101:246-259.e6.
- 653 28. Adams JB, Borody TJ, Kang D-W, Khoruts A, Krajmalnik-Brown R, Sadowsky MJ. Microbiota transplant  
654 therapy and autism: lessons for the clinic. *Expert Rev Gastroenterol Hepatol*. 2019;13:1033–7.
- 655 29. Adams JB, Vargason T, Kang D-W, Krajmalnik-Brown R, Hahn J. Multivariate Analysis of Plasma  
656 Metabolites in Children with Autism Spectrum Disorder and Gastrointestinal Symptoms Before and After  
657 Microbiota Transfer Therapy. *Processes*. 2019;7:806.
- 658 30. Borre YE, O’Keeffe GW, Clarke G, Stanton C, Dinan TG, Cryan JF. Microbiota and neurodevelopmental  
659 windows: implications for brain disorders. *Trends Mol Med*. 2014;20:509–18.
- 660 31. Magistris L de, Familiari V, Pascotto A, Sapone A, Frolli A, Iardino P, et al. Alterations of the Intestinal  
661 Barrier in Patients With Autism Spectrum Disorders and in Their First-degree Relatives. *J Pediatr Gastroenterol*  
662 *Nutr*. 2010;51:418–24.
- 663 32. Aldred S, Moore KM, Fitzgerald M, Waring RH. Plasma Amino Acid Levels in Children with Autism and  
664 Their Families. *J Autism Dev Disord*. 2003;33:93–7.
- 665 33. Evans C, Dunstan RH, Rothkirch T, Roberts TK, Reichelt KL, Cosford R, et al. Altered amino acid excretion  
666 in children with autism. *Nutr Neurosci*. 2008;11:9–17.
- 667 34. De Angelis M, Piccolo M, Vannini L, Siragusa S, De Giacomo A, Serrazanetti DI, et al. Fecal Microbiota  
668 and Metabolome of Children with Autism and Pervasive Developmental Disorder Not Otherwise Specified. *Plos*  
669 *One*. 2013;8:e76993.
- 670 35. Kang D-W, Ilhan ZE, Isern NG, Hoyt DW, Howsmon DP, Shaffer M, et al. Differences in fecal microbial  
671 metabolites and microbiota of children with autism spectrum disorders. *Anaerobe*. 2018;49:121–31.
- 672 36. Naushad SM, Jain JMN, Prasad CK, Naik U, Akella RRD. Autistic children exhibit distinct plasma amino  
673 acid profile. *Indian J Biochem Biophys*. 2013;50:474–8.

- 674 37. Barone R, Alaimo S, Messina M, Pulvirenti A, Bastin J, Group M-A, et al. A Subset of Patients With Autism  
675 Spectrum Disorders Show a Distinctive Metabolic Profile by Dried Blood Spot Analyses. *Front Psychiatry*.  
676 2018;9.
- 677 38. Anwar A, Abruzzo PM, Pasha S, Rajpoot K, Bolotta A, Ghezzi A, et al. Advanced glycation endproducts,  
678 dityrosine and arginine transporter dysfunction in autism - a source of biomarkers for clinical diagnosis. *Mol*  
679 *Autism*. 2018;9:3.
- 680 39. Smith AM, King JJ, West PR, Ludwig MA, Donley ELR, Burrier RE, et al. Amino Acid Dysregulation  
681 Metabotypes: Potential Biomarkers for Diagnosis and Individualized Treatment for Subtypes of Autism  
682 Spectrum Disorder. *Biol Psychiatry*. 2019;85:345–54.
- 683 40. West PR, Amaral DG, Bais P, Smith AM, Egnash LA, Ross ME, et al. Metabolomics as a Tool for  
684 Discovery of Biomarkers of Autism Spectrum Disorder in the Blood Plasma of Children. *PLoS ONE*. 2014;9.
- 685 41. Rangel-Huerta OD, Gomez-Fernández A, de la Torre-Aguilar MJ, Gil A, Perez-Navero JL, Flores-Rojas K,  
686 et al. Metabolic profiling in children with autism spectrum disorder with and without mental regression:  
687 preliminary results from a cross-sectional case-control study. *Metabolomics Off J Metabolomic Soc*. 2019;15:99.
- 688 42. Bitar T, Mavel S, Emond P, Nadal-Desbarats L, Lefèvre A, Mattar H, et al. Identification of metabolic  
689 pathway disturbances using multimodal metabolomics in autistic disorders in a Middle Eastern population. *J*  
690 *Pharm Biomed Anal*. 2018;152:57–65.
- 691 43. Delaye J-B, Patin F, Lagrue E, Le Tilly O, Bruno C, Vuillaume M-L, et al. Post hoc analysis of plasma  
692 amino acid profiles: towards a specific pattern in autism spectrum disorder and intellectual disability. *Ann Clin*  
693 *Biochem*. SAGE Publications; 2018;55:543–52.
- 694 44. Kuwabara H, Yamasue H, Koike S, Inoue H, Kawakubo Y, Kuroda M, et al. Altered Metabolites in the  
695 Plasma of Autism Spectrum Disorder: A Capillary Electrophoresis Time-of-Flight Mass Spectroscopy Study.  
696 *PLoS ONE*. 2013;8.
- 697 45. Retey J. The Urocanase Story: A Novel Role of NAD<sup>+</sup> as Electrophile. *Arch Biochem Biophys*. 1994;314:1–  
698 16.
- 699 46. Shaw W. Increased urinary excretion of a 3-(3-hydroxyphenyl)-3-hydroxypropionic acid (HPPA), an  
700 abnormal phenylalanine metabolite of *Clostridia* spp. in the gastrointestinal tract, in urine samples from patients  
701 with autism and schizophrenia. *Nutr Neurosci*. 2010;13:135–43.
- 702 47. Mavel S, Nadal-Desbarats L, Blasco H, Bonnet-Brilhault F, Barthélémy C, Montigny F, et al. 1H-13C NMR-  
703 based urine metabolic profiling in autism spectrum disorders. *Talanta*. 2013;114:95–102.
- 704 48. Yap IKS, Angley M, Veselkov KA, Holmes E, Lindon JC, Nicholson JK. Urinary metabolic phenotyping  
705 differentiates children with autism from their unaffected siblings and age-matched controls. *J Proteome Res*.  
706 2010;9:2996–3004.
- 707 49. Ming X, Stein TP, Barnes V, Rhodes N, Guo L. Metabolic perturbation in autism spectrum disorders: a  
708 metabolomics study. *J Proteome Res*. 2012;11:5856–62.
- 709 50. Liu A, Zhou W, Qu L, He F, Wang H, Wang Y, et al. Altered Urinary Amino Acids in Children With Autism  
710 Spectrum Disorders. *Front Cell Neurosci*. 2019;13.

- 711 51. Kałużna-Czaplińska J. Noninvasive urinary organic acids test to assess biochemical and nutritional  
712 individuality in autistic children. *Clin Biochem.* 2011;44:686–91.
- 713 52. Lussu M, Noto A, Masili A, Rinaldi AC, Dessì A, Angelis MD, et al. The urinary <sup>1</sup>H-NMR metabolomics  
714 profile of an Italian autistic children population and their unaffected siblings. *Autism Res.* 2017;10:1058–66.
- 715 53. Chen Q, Qiao Y, Xu X, You X, Tao Y. Urine Organic Acids as Potential Biomarkers for Autism-Spectrum  
716 Disorder in Chinese Children. *Front Cell Neurosci.* 2019;13.
- 717 54. Emond P, Mavel S, Aïdoud N, Nadal-Desbarats L, Montigny F, Bonnet-Brilhault F, et al. GC-MS-based  
718 urine metabolic profiling of autism spectrum disorders. *Anal Bioanal Chem.* 2013;405:5291–300.
- 719 55. Noto A, Fanos V, Barberini L, Grapov D, Fattuoni C, Zaffanello M, et al. The urinary metabolomics profile  
720 of an Italian autistic children population and their unaffected siblings. *J Matern Fetal Neonatal Med.*  
721 2014;27:46–52.
- 722 56. Gevi F, Zolla L, Gabriele S, Persico AM. Urinary metabolomics of young Italian autistic children supports  
723 abnormal tryptophan and purine metabolism. *Mol Autism.* 2016;7:47.
- 724 57. Wang M, Wan J, Rong H, He F, Wang H, Zhou J, et al. Alterations in Gut Glutamate Metabolism Associated  
725 with Changes in Gut Microbiota Composition in Children with Autism Spectrum Disorder. *mSystems. American*  
726 *Society for Microbiology Journals;* 2019;4.
- 727 58. Nørgaard-Pedersen B, Hougaard DM. Storage policies and use of the Danish Newborn Screening Biobank. *J*  
728 *Inherit Metab Dis.* 2007;30:530–6.
- 729 59. Pedersen CB, Bybjerg-Grauholm J, Pedersen MG, Grove J, Agerbo E, Bækvad-Hansen M, et al. The  
730 iPSYCH2012 case-cohort sample: new directions for unravelling genetic and environmental architectures of  
731 severe mental disorders. *Mol Psychiatry.* 2018;23:6–14.
- 732 60. Vogeser M, Schuster C, Rockwood AL. A proposal to standardize the description of LC-MS-based  
733 measurement methods in laboratory medicine. *Clin Mass Spectrom.* 2019;13:36–8.
- 734 61. Chambers MC, Maclean B, Burke R, Amodei D, Ruderman DL, Neumann S, et al. A cross-platform toolkit  
735 for mass spectrometry and proteomics. *Nat Biotechnol.* 2012;30:918–20.
- 736 62. Katajamaa M, Miettinen J, Oresic M. MZmine: toolbox for processing and visualization of mass  
737 spectrometry based molecular profile data. *Bioinforma Oxf Engl.* 2006;22:634–6.
- 738 63. Pluskal T, Castillo S, Villar-Briones A, Orešič M. MZmine 2: Modular framework for processing,  
739 visualizing, and analyzing mass spectrometry-based molecular profile data. *BMC Bioinformatics.* 2010;11:395.
- 740 64. Myers OD, Sumner SJ, Li S, Barnes S, Du X. One Step Forward for Reducing False Positive and False  
741 Negative Compound Identifications from Mass Spectrometry Metabolomics Data: New Algorithms for  
742 Constructing Extracted Ion Chromatograms and Detecting Chromatographic Peaks. *Anal Chem.* 2017;89:8696–  
743 703.
- 744 65. Nothias LF, Petras D, Schmid R, Dührkop K, Rainer J, Sarvepalli A, et al. Feature-based Molecular  
745 Networking in the GNPS Analysis Environment. *bioRxiv.* 2019;812404.

- 746 66. Wang M, Carver JJ, Phelan VV, Sanchez LM, Garg N, Peng Y, et al. Sharing and community curation of  
747 mass spectrometry data with Global Natural Products Social Molecular Networking. *Nat Biotechnol.*  
748 2016;34:828–37.
- 749 67. Shannon P, Markiel A, Ozier O, Baliga NS, Wang JT, Ramage D, et al. Cytoscape: a software environment  
750 for integrated models of biomolecular interaction networks. *Genome Res.* 2003;13:2498–504.
- 751 68. Schrimpe-Rutledge AC, Codreanu SG, Sherrod SD, McLean JA. Untargeted Metabolomics Strategies—  
752 Challenges and Emerging Directions. *J Am Soc Mass Spectrom.* 2016;27:1897–905.
- 753 69. Sumner LW, Amberg A, Barrett D, Beale MH, Beger R, Daykin CA, et al. Proposed minimum reporting  
754 standards for chemical analysis: Chemical Analysis Working Group (CAWG) Metabolomics Standards Initiative  
755 (MSI). *Metabolomics.* 2007;3:211–21.
- 756 70. Hooft JJJ van der, Wandy J, Barrett MP, Burgess KEV, Rogers S. Topic modeling for untargeted  
757 substructure exploration in metabolomics. *Proc Natl Acad Sci.* 2016;113:13738–43.
- 758 71. Silva RR da, Wang M, Nothias L-F, Hooft JJJ van der, Caraballo-Rodríguez AM, Fox E, et al. Propagating  
759 annotations of molecular networks using in silico fragmentation. *PLOS Comput Biol.* 2018;14:e1006089.
- 760 72. Mohimani H, Gurevich A, Mikheenko A, Garg N, Nothias L-F, Ninomiya A, et al. Dereplication of peptidic  
761 natural products through database search of mass spectra. *Nat Chem Biol.* 2017;13:30–7.
- 762 73. Ernst M, Kang KB, Caraballo-Rodríguez AM, Nothias L-F, Wandy J, Chen C, et al. MolNetEnhancer:  
763 Enhanced Molecular Networks by Integrating Metabolome Mining and Annotation Tools. *Metabolites.*  
764 2019;9:144.
- 765 74. Djoumbou Feunang Y, Eisner R, Knox C, Chepelev L, Hastings J, Owen G, et al. ClassyFire: automated  
766 chemical classification with a comprehensive, computable taxonomy. *J Cheminformatics.* 2016;8:61.
- 767 75. Wang M, Jarmusch AK, Vargas F, Aksenov AA, Gauglitz JM, Weldon K, et al. Mass spectrometry searches  
768 using MASST. *Nat Biotechnol.* 2020;38:23–6.
- 769 76. Böcker S, Dührkop K. Fragmentation trees reloaded. *J Cheminformatics.* 2016;8:5.
- 770 77. Dührkop K, Shen H, Meusel M, Rousu J, Böcker S. Searching molecular structure databases with tandem  
771 mass spectra using CSI:FingerID. *Proc Natl Acad Sci U S A.* 2015;112:12580–5.
- 772 78. Dührkop K, Fleischauer M, Ludwig M, Aksenov AA, Melnik AV, Meusel M, et al. SIRIUS 4: a rapid tool  
773 for turning tandem mass spectra into metabolite structure information. *Nat Methods.* 2019;16:299–302.
- 774 79. Shen H, Dührkop K, Böcker S, Rousu J. Metabolite identification through multiple kernel learning on  
775 fragmentation trees. *Bioinforma Oxf Engl.* 2014;30:i157-164.
- 776 80. da Silva RR, Vargas F, Ernst M, Nguyen NH, Bolleddu S, del Rosario KK, et al. Computational Removal of  
777 Undesired Mass Spectral Features Possessing Repeat Units via a Kendrick Mass Filter. *J Am Soc Mass*  
778 *Spectrom.* 2019;30:268–77.
- 779 81. Bolyen E, Rideout JR, Dillon MR, Bokulich NA, Abnet CC, Al-Ghalith GA, et al. Reproducible, interactive,  
780 scalable and extensible microbiome data science using QIIME 2. *Nat Biotechnol.* 2019;37:852–7.



- 781 82. Vázquez-Baeza Y, Pirrung M, Gonzalez A, Knight R. EMPeRor: a tool for visualizing high-throughput  
782 microbial community data. *GigaScience*. 2013;2.
- 783 83. Martino C, Morton JT, Marotz CA, Thompson LR, Tripathi A, Knight R, et al. A Novel Sparse  
784 Compositional Technique Reveals Microbial Perturbations. *mSystems*. 2019;4:e00016-19.
- 785 84. Chong J, Soufan O, Li C, Caraus I, Li S, Bourque G, et al. MetaboAnalyst 4.0: towards more transparent and  
786 integrative metabolomics analysis. *Nucleic Acids Res*. 2018;46:W486–94.
- 787 85. Anderson MJ. A new method for non-parametric multivariate analysis of variance. *Austral Ecol*.  
788 2001;26:32–46.
- 789 86. R Core Team. R: a language and environment for statistical computing [Internet]. R Found. Stat. Comput.  
790 Vienna Austria. 2019 [cited 2019 Nov 21]. Available from: <https://www.R-project.org/>
- 791 87. Glinton KE, Elsea SH. Untargeted Metabolomics for Autism Spectrum Disorders: Current Status and Future  
792 Directions. *Front Psychiatry*. 2019;10.
- 793 88. Mizejewski GJ, Lindau-Shepard B, Pass KA. Newborn screening for autism: in search of candidate  
794 biomarkers. *Biomark Med*. 2013;7:247–60.
- 795 89. Lee M, Martin-Ruiz C, Graham A, Court J, Jaros E, Perry R, et al. Nicotinic receptor abnormalities in the  
796 cerebellar cortex in autism. *Brain J Neurol*. 2002;125:1483–95.
- 797 90. Janecka M, Kodesh A, Levine SZ, Lusskin SI, Viktorin A, Rahman R, et al. Association of Autism Spectrum  
798 Disorder With Prenatal Exposure to Medication Affecting Neurotransmitter Systems. *JAMA Psychiatry*.  
799 2018;75:1217–24.
- 800 91. Saigal S, Doyle LW. An overview of mortality and sequelae of preterm birth from infancy to adulthood. *The*  
801 *Lancet*. 2008;371:261–9.
- 802 92. Gil AM, Duarte D. Biofluid Metabolomics in Preterm Birth Research. *Reprod Sci*. 2018;25:967–77.
- 803 93. Ernst M, Rogers S, Lausten-Thomsen U, Bjorkbom A, Laursen SS, Courraud J, et al. Gestational-age-  
804 dependent development of the neonatal metabolome. *medRxiv*. Cold Spring Harbor Laboratory Press;  
805 2020;2020.03.27.20045534.
- 806 94. Dionisi-Vici C, Deodato F, Roschinger W, Rhead W, Wilcken B. “Classical” organic acidurias, propionic  
807 aciduria, methylmalonic aciduria and isovaleric aciduria: Long-term outcome and effects of expanded newborn  
808 screening using tandem mass spectrometry. *J Inherit Metab Dis*. Springer; 2006;29:383–9.
- 809 95. Milani C, Duranti S, Bottacini F, Casey E, Turroni F, Mahony J, et al. The First Microbial Colonizers of the  
810 Human Gut: Composition, Activities, and Health Implications of the Infant Gut Microbiota. *Microbiol Mol Biol*  
811 *Rev MMBR*. 2017;81.
- 812 96. Backhed F, Roswall J, Peng Y, Feng Q, Jia H, Kovatcheva-Datchary P, et al. Dynamics and Stabilization of  
813 the Human Gut Microbiome during the First Year of Life. *Cell Host Microbe*. 2015;17:690–703.
- 814 97. Rosa PSL, Warner BB, Zhou Y, Weinstock GM, Sodergren E, Hall-Moore CM, et al. Patterned progression  
815 of bacterial populations in the premature infant gut. *Proc Natl Acad Sci*. 2014;111:12522–7.

- 816 98. Wilmanski T, Rappaport N, Earls JC, Magis AT, Manor O, Lovejoy J, et al. Blood metabolome predicts gut  
817 microbiome  $\alpha$ -diversity in humans. *Nat Biotechnol.* 2019;37:1217–28.
- 818 99. Meng D, Sommella E, Salviati E, Campiglia P, Ganguli K, Djebali K, et al. Indole-3-lactic acid, a metabolite  
819 of tryptophan, secreted by *Bifidobacterium longum* subspecies *infantis* is anti-inflammatory in the immature  
820 intestine. *Pediatr Res.* Nature Publishing Group; 2020;1–9.
- 821 100. Laursen MF, Sakanaka M, Burg N von, Andersen D, Mörbe U, Rivollier A, et al. Breastmilk-promoted  
822 bifidobacteria produce aromatic lactic acids in the infant gut. *bioRxiv.* Cold Spring Harbor Laboratory;  
823 2020;2020.01.22.914994.
- 824 101. Keller MC, Fredrickson BL, Ybarra O, Cote S, Johnson K, Mikels J, et al. A warm heart and a clear head -  
825 The contingent effects of weather on mood and cognition. *Psychol Sci.* Blackwell Publishing; 2005;16:724–31.
- 826 102. D’Amato G, Holgate ST, Pawankar R, Ledford DK, Cecchi L, Al-Ahmad M, et al. Meteorological  
827 conditions, climate change, new emerging factors, and asthma and related allergic disorders. A statement of the  
828 World Allergy Organization. *World Allergy Organ J.* Elsevier; 2015;8:UNSP 25.
- 829 103. Ruoppolo M, Scolamiero E, Caterino M, Mirisola V, Franconi F, Campesi I. Female and male human  
830 babies have distinct blood metabolomic patterns. *Mol Biosyst.* 2015;11:2483–92.
- 831 104. Diaz SO, Pinto J, Barros AS, Morais E, Duarte D, Negrão F, et al. Newborn Urinary Metabolic Signatures  
832 of Prematurity and Other Disorders: A Case Control Study. *J Proteome Res.* 2016;15:311–25.
- 833 105. Challis J, Newnham J, Petraglia F, Yeganegi M, Bocking A. Fetal sex and preterm birth. *Placenta.*  
834 2013;34:95–9.
- 835 106. Wilkin TJ, Murphy MJ. The gender insulin hypothesis: why girls are born lighter than boys, and the  
836 implications for insulin resistance. *Int J Obes.* 2006;30:1056–61.
- 837 107. Wehrens R, Hageman JosA, van Eeuwijk F, Kooke R, Flood PJ, Wijnker E, et al. Improved batch  
838 correction in untargeted MS-based metabolomics. *Metabolomics.* 2016;12.
- 839 108. Petrick L, Edmands W, Schiffman C, Grigoryan H, Perttula K, Yano Y, et al. An untargeted metabolomics  
840 method for archived newborn dried blood spots in epidemiologic studies. *Metabolomics Off J Metabolomic Soc.*  
841 2017;13.
- 842 109. Folketinget. Bekendtgørelse af lov om videnskabetisk behandling af sundhedsvidenskabelige  
843 forskningsprojekter - (The Danish Parliament. Order of law on scientific treatment of health scientific research  
844 projects) [Internet]. *retsinformation.dk.* 2017 [cited 2019 Oct 28]. Available from:  
845 <https://www.retsinformation.dk/Forms/r0710.aspx?id=192671>

846



847 **Tables**

848 **Table 1. Subjects characteristics**

|                                                                 | <b>All subjects<br/>n = 74</b> |             |          |                 | <b>After outlier removal<br/>n = 68</b> |                  |          |                 |   |
|-----------------------------------------------------------------|--------------------------------|-------------|----------|-----------------|-----------------------------------------|------------------|----------|-----------------|---|
|                                                                 | cases                          |             | controls |                 | cases                                   |                  | controls |                 |   |
| <b>Age at 1<sup>st</sup> Jan. 2006 (months, median (range))</b> | 7.6                            | (0.8-11.6)  | 7.6      | (0.8-11.6)      | 7.3                                     | (0.8-11.6)       | 7.5      | (0.8-11.6)      |   |
| <b>Gender (girls / boys)</b>                                    | 8 / 29                         |             | 8 / 29   |                 | 7 / 25                                  |                  | 8 / 28   |                 |   |
| <b>Classification of cases (ICD10)<sup>1</sup></b>              |                                |             |          |                 |                                         |                  |          |                 |   |
| - <b>F84.0 Childhood autism</b>                                 | 17                             |             | -        |                 | 15                                      |                  | -        |                 |   |
| - <b>F84.1 Atypical autism</b>                                  | 7                              |             | -        |                 | 6                                       |                  | -        |                 |   |
| - <b>F84.5 Asperger syndrome</b>                                | 4                              |             | -        |                 | 3                                       |                  | -        |                 |   |
| - <b>F84.8 Other pervasive developmental disorders</b>          | 4                              |             | -        |                 | 4                                       |                  | -        |                 |   |
| - <b>F84.9 Unspecified pervasive developmental disorders</b>    | 11                             |             | -        |                 | 10                                      |                  | -        |                 |   |
| <b>Gestational age (weeks, median (range), NA)</b>              | 40                             | (33-42)     | 5        | 39 (30-42)      | 2                                       | 40 (33-41)       | 4        | 39 (30-42)      | 2 |
| <b>Birthweight (g, median (range), NA)</b>                      | 3500                           | (2210-4880) | 1        | 3480 (977-4850) | 2                                       | 3498 (2210-4880) | 0        | 3490 (977-4850) | 2 |
| <b>Age at sampling (days, median (range), NA)</b>               | 6                              | (3-9)       | 3        | 6 (4-10)        | 3                                       | 6 (3-9)          | 2        | 6 (4-10)        | 3 |
| <b>Age of mother at birth (years, median (range))</b>           | 31.7                           | (20.8-41.5) | 31.7     | (18.3-41.2)     | 32.3                                    | (20.8-41.5)      | 31.8     | (18.3-41.2)     |   |

849 <sup>1</sup> ICD10 classification [2]

850 More details are provided in Additional file 6.

851

852

853

854 **Table 2. Differentially abundant features in univariate analyses without FDR correction (p<0.01) and/or with high fold-change**  
 855 **meeting inspection criteria**

| Putative annotation<br>of relevant<br>compounds                                                         | Annotation<br>level <sup>1</sup> | m/z        | RT<br>(min) | ID          | p-value t-test               |                        | p-value Wilcoxon<br>rank-sum test |                        | FC <sup>2</sup> | Network<br>connections <sup>3</sup>  |
|---------------------------------------------------------------------------------------------------------|----------------------------------|------------|-------------|-------------|------------------------------|------------------------|-----------------------------------|------------------------|-----------------|--------------------------------------|
|                                                                                                         |                                  |            |             |             | without<br>FDR<br>correction | with FDR<br>correction | without<br>FDR<br>correction      | with FDR<br>correction |                 |                                      |
| Methacholine<br>C <sub>8</sub> H <sub>18</sub> NO <sub>2</sub> <sup>+</sup>                             | 2 <sup>4</sup>                   | 160.13315  | 0.45        | <b>159</b>  | <b>0.0021</b>                | 0.9174                 | <b>0.0031</b>                     | 0.9434                 | 1.25            | connected to<br>1853 (-0.036<br>m/z) |
| SIRIUS 99.96%:<br>C <sub>11</sub> H <sub>22</sub> N <sub>2</sub> O <sub>3</sub> (M+H <sup>+</sup> )     | 4                                | 231.17005  | 2.78        | <b>5593</b> | <b>0.0072</b>                | 0.9174                 | 0.0138                            | 0.9434                 | 1.46            | Single node                          |
| SIRIUS 7.12%:<br>C <sub>36</sub> H <sub>63</sub> N <sub>21</sub> O <sub>14</sub><br>(M+H <sup>+</sup> ) | 4                                | 1014.48923 | 6.64        | <b>8605</b> | 0.0414                       | 0.9174                 | 0.0179                            | 0.9434                 | <b>0.42</b>     | Single node                          |

856 <sup>1</sup> Annotation level of confidence according to the Metabolomics Standards Initiative (i.e. putative annotation) [68,69].

857 <sup>2</sup> FC: Fold-change (case/control)

858 <sup>3</sup> Network connections in GNPS feature-based molecular network.

859 <sup>4</sup> Source of annotation mzCloud (89.9% score). See its mass spectrum in Additional file 10.

860 Inspection criteria: peak integration or shape quality, initial missing values, single values plot, presence and consistence in replicated  
 861 pool injections, annotation or connection to contaminants. For details see Additional file 7.

862

863

864

865

866

867

868 **Table 3. Compounds reported in the literature three or more times as being associated with ASD**

| Compound name     | Annotation level <sup>1</sup> | Raw formula | <i>m/z</i> [M+H] <sup>+</sup> | RT (min) | Feature ID (MZmine 2.41) | Detected by Compound Discoverer 2.1 | HMDB ID     | Literature reference |
|-------------------|-------------------------------|-------------|-------------------------------|----------|--------------------------|-------------------------------------|-------------|----------------------|
| Arginine          | 1                             | C6H14N4O2   | 175.11895                     | 0.35     | 1450                     | ND                                  | HMDB0000517 | [38,44,50]           |
| Aspartic acid     | 1                             | C4H7NO4     | 134.04478                     | 0.41     | 1073                     | ND                                  | HMDB0000191 | [34,35,40,41,50,57]  |
| Citric acid       | 4                             | C6H8O7      | 193.03428                     | 0.35     | 1776                     | yes                                 | HMDB0000094 | [40,42,51]           |
| Creatine          | 2                             | C4H9N3O2    | 132.07675                     | 0.40     | 16                       | yes                                 | HMDB0000064 | [42,47,52]           |
| Creatinine        | 2                             | C4H7N3O     | 114.06619                     | 0.40     | 281                      | yes                                 | HMDB0000562 | [40,50,52,53]        |
| Decanoylcarnitine | 1                             | C17H33NO4   | 316.24823                     | 6.00     | 3633                     | yes                                 | HMDB0000651 | [37,41,57]           |
| Glutamic acid     | 1                             | C5H9NO4     | 148.06043                     | 0.38     | 136                      | yes                                 | HMDB0000148 | [34,35,38,40–43,52]  |
| Glutamine         | 2                             | C5H10N2O3   | 147.07642                     | 0.40     | 107                      | yes                                 | HMDB0000641 | [35,38,39]           |
| Glycine           | 3                             | C2H5NO2     | 76.03930                      | 0.38     | 1177                     | ND                                  | HMDB0000123 | [34,39,43,47,49,52]  |
| Glycolic acid     | -                             | C2H4O3      | 77.02332                      | -        | ND                       | ND                                  | HMDB0000115 | [53–55]              |
| Hippuric acid     | 2                             | C9H9N1O3    | 180.06552                     | 3.04     | 5174                     | ND                                  | HMDB0000714 | [48,51,52,54]        |
| Histidine         | 2                             | C6H9N3O2    | 156.07675                     | 0.32     | 342                      | yes                                 | HMDB0000177 | [34,49,56]           |
| Lactic acid       | -                             | C3H6O3      | 91.03897                      | -        | ND                       | ND                                  | HMDB0000190 | [35,44,52]           |
| p-cresol          | -                             | C7H8O1      | 109.06479                     | -        | ND                       | ND                                  | HMDB0001858 | [34,35,53,56]        |
| Phenylalanine     | 1                             | C9H11NO2    | 166.08625                     | 1.70     | 594+5370+287             | yes                                 | HMDB0000159 | [34,56,57]           |
| Serine            | 2                             | C3H7NO3     | 106.04987                     | 0.40     | 437                      | ND                                  | HMDB0000187 | [34,40,42,43,49]     |
| Succinic acid     | -                             | C4H6O4      | 119.03388                     | -        | ND                       | ND                                  | HMDB0000254 | [40,47,48,54]        |
| Taurine           | 3                             | C2H7NO3S    | 126.02194                     | 0.43     | 428                      | ND                                  | HMDB0000251 | [25,44,47–49,52]     |
| Threonine         | 2                             | C4H9NO3     | 120.06552                     | 0.40     | 476                      | ND                                  | HMDB0000167 | [38,42,49,50]        |
| Tryptophan        | 2                             | C11H12N2O2  | 205.09715                     | 2.53     | 164                      | yes                                 | HMDB0000929 | [38,41,52,55,56]     |
| Tyrosine          | 1                             | C9H11NO3    | 182.08117                     | 0.72     | 58                       | yes                                 | HMDB0000158 | [35,42,57]           |
| Valine            | 2                             | C5H11NO2    | 118.08625                     | 0.42     | ND                       | yes                                 | HMDB0000883 | [34,39,52]           |

869 ND: not detected

- 870 <sup>1</sup> Annotation level of confidence according to the Metabolomics Standards Initiative (i.e. putative annotation) [68,69].
- 871 When the [M+H]<sup>+</sup> adduct could not be found (+/- 5 ppm), common adducts were searched including [M+Na]<sup>+</sup>, [M+K]<sup>+</sup>, [M+2H]<sup>2+</sup>,
- 872 [M+H-H<sub>2</sub>O]<sup>+</sup>.
- 873 See full list of compounds considered and more details in Additional file 11.

874 **Figures**

875 Figure 1. Feature-based molecular network displaying the 15 predominant putative chemical classes  
876 and their subclasses

877 Nodes represent mass spectral features and are used as a proxy for a metabolite. Connected nodes  
878 represent high tandem mass spectral similarity, and thus high chemical structural similarity. The  
879 thickness of the grey edges connecting nodes varies according to the cosine score representing to what  
880 extent two connected metabolites are chemically similar (based on MS2 spectra, from 0.7: less similar  
881 and thin edge to 1.0: identical and thick edge).

882 The name of annotated metabolites (levels 1 and 2), details on chemical classes with fewer than 4  
883 metabolites (absent on this figure), chemical classification scores [73], all unknowns, and group  
884 intensities for all features (average, standard deviations) are detailed in Additional file 7.

885 [See Figure\\_1.pdf](#)

886

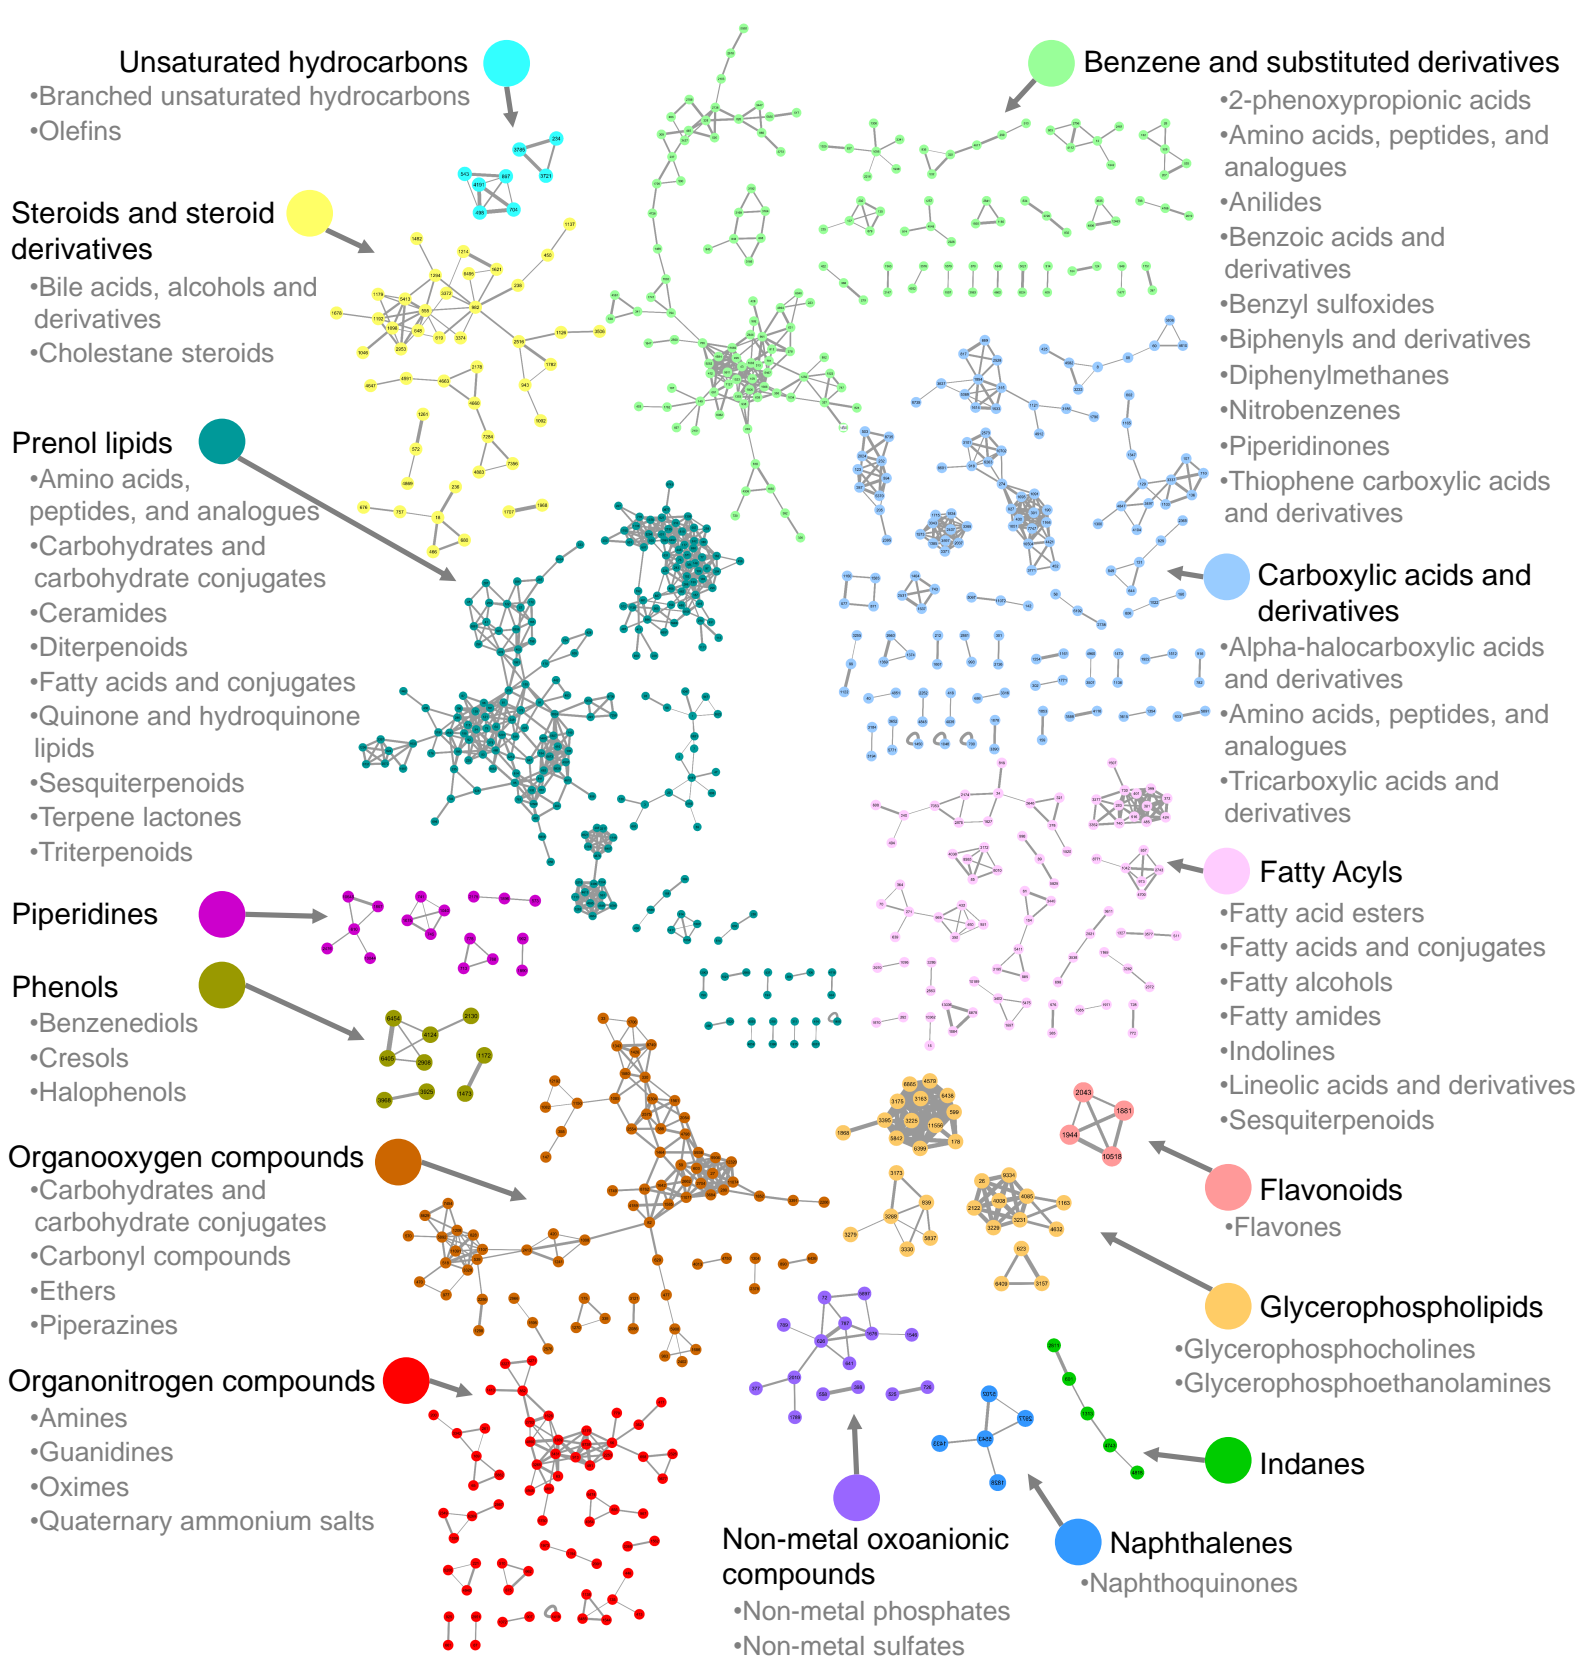

887 Figure 2. Network of molecular features putatively annotated as bile acids with average group  
888 intensities, fold change values, mass differences and cosine scores displayed.  
889 Molecular family #75 is composed of eight bile acid structural analogues (see details in Additional File  
890 7). Coloring according to the fold change values makes it easier to spot the families with differential  
891 abundance in cases vs. controls. Displaying average intensities for the three groups (cases, controls,  
892 paper blanks) allows for a quick control of the noise (paper blanks, here no noise detected) and  
893 confirmation of fold change. On edges, while the thickness of the connection represents to what extent  
894 two metabolites are chemically similar, the mass difference is essential to support annotation as it  
895 translates into how molecules differ from one another (e.g. water loss, conjugation, adducts, etc.).  
896 [See Figure\\_2.pdf](#)  
897



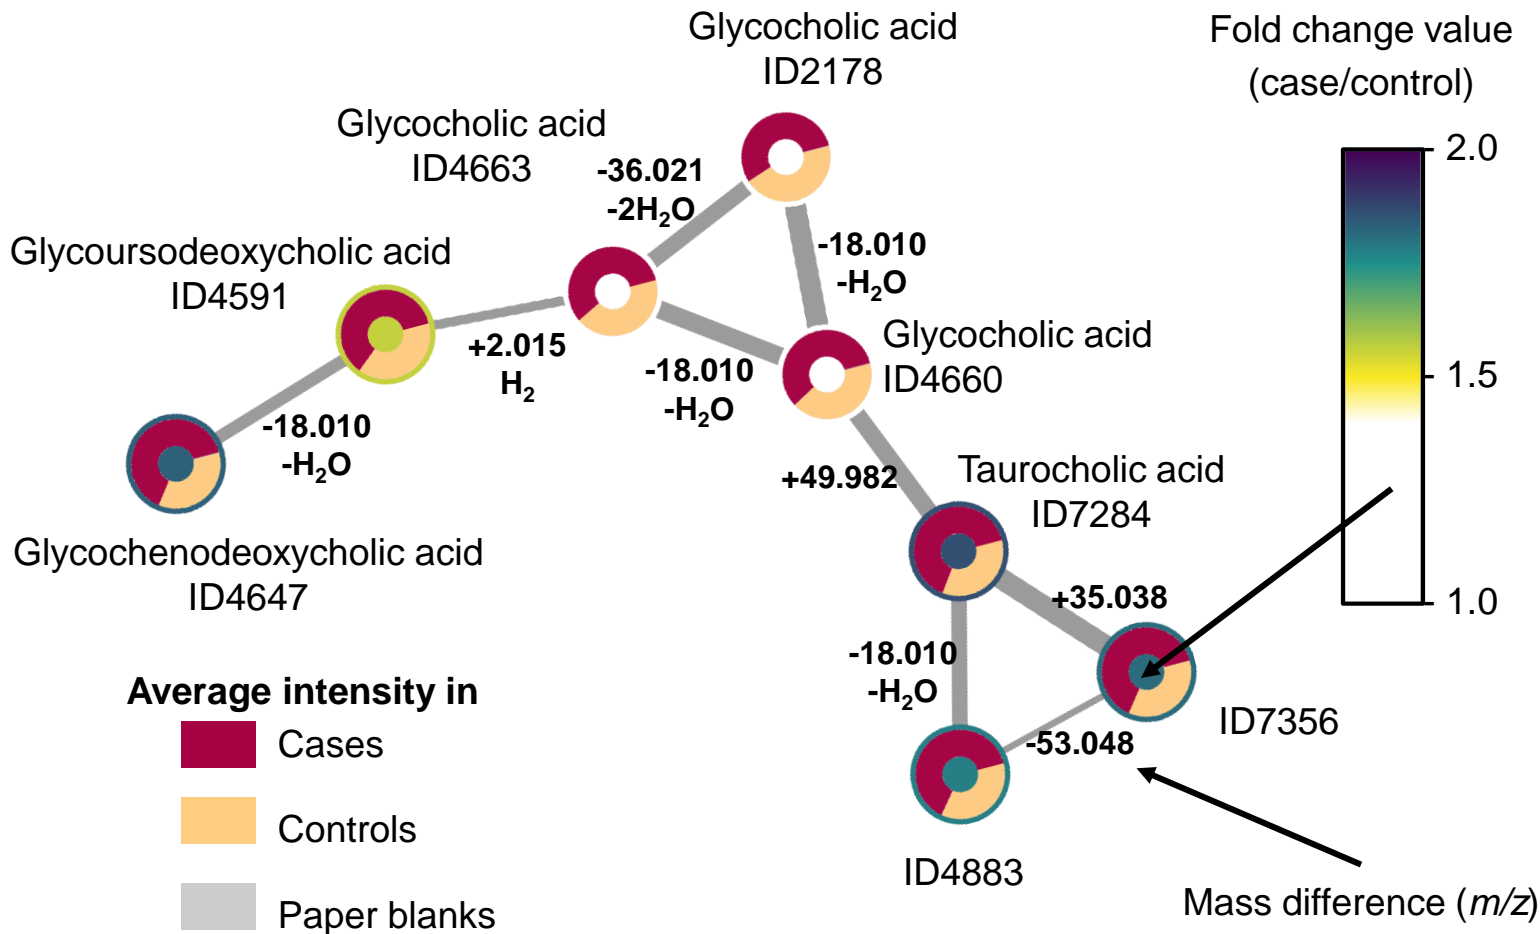

898 Figure 3. Bray-Curtis principal coordinates analysis of the 68 samples after outlier removal.  
899 Each sphere represents one sample. Axes are principal components 1 (x) and 3 (y) explaining 18.48%  
900 and 8.79% of the variability in the data, respectively. The four replicated pool injections cluster  
901 satisfactorily.

902 a) Coloring reflects the type of samples, i.e. cases, controls and four replicated pool injections. No clear  
903 distinction between cases and controls can be observed (PERMANOVA Adonis  $R^2 = 0.014$ , P-value =  
904 0.777).

905 b) Coloring reflects the month of birth for the 68 samples as well as the four replicated pool injections.  
906 Samples collected in the winter (dark purple and yellow, extremities of the colors scale) are positioned  
907 away from the samples collected in summer (green and turquoise, middle of the color scale). 26.2% of  
908 the variation in the data can be explained by month of birth (Adonis  $R^2 = 0.262$ , P-value = 0.001)  
909 See Additional file 8 for detailed values with and without FDR correction and for other distance  
910 matrices.

911 [See Figure\\_3ab.pdf](#)

912

**a**

Axis 3 (8.792 %)

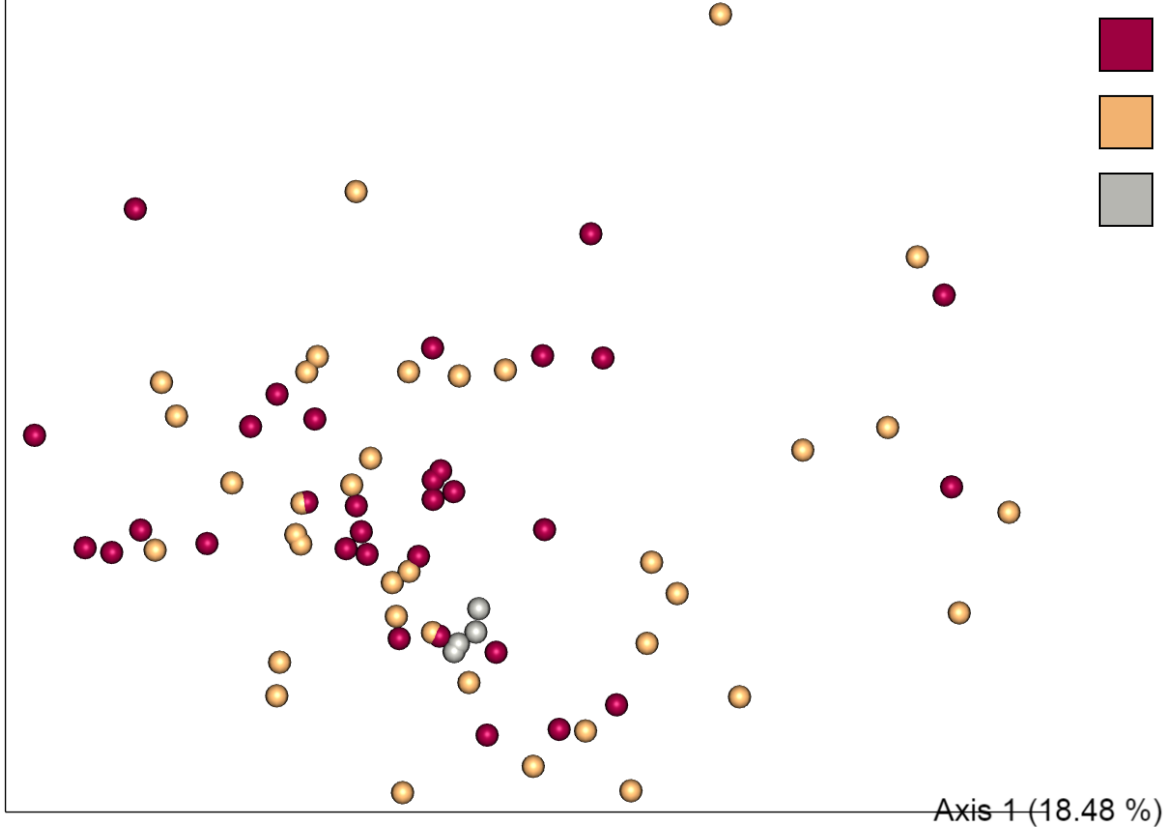**b**

Axis 3 (8.792 %)

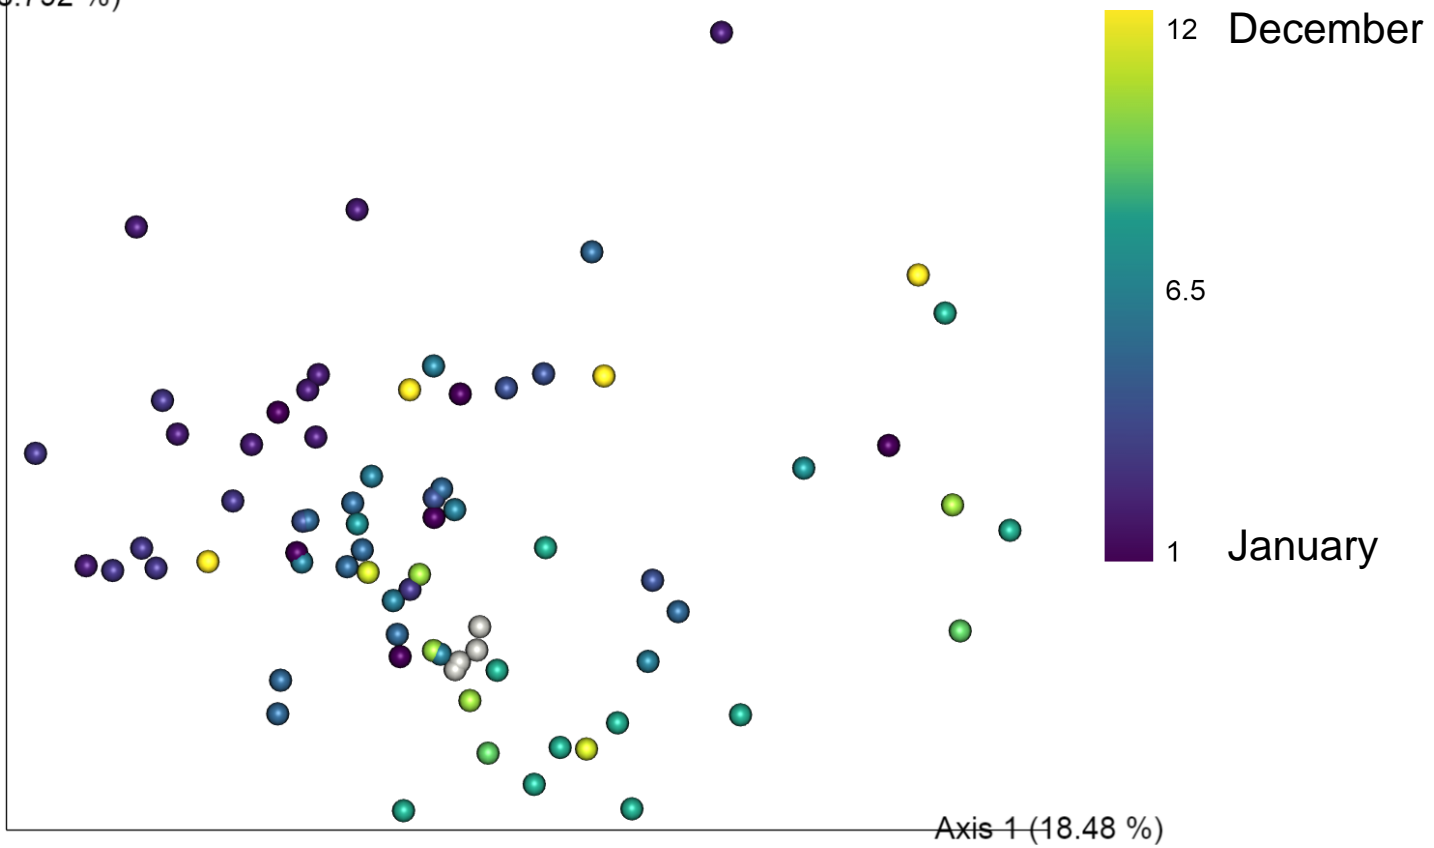

913 Figure 4. PERMANOVAs of the four tested distance matrices showing how much of the variation  
914 (Adonis  $R^2$ ) is explained by a metadata variable.  
915 P-values include FDR correction. A star is present when the corrected p-values was  $<0.05$ .  
916 All exact values are available in Additional file 8 and detailed metadata (subject characteristics) are  
917 available in Table 1 and Additional file 6.  
918 [See Figure\\_4.pdf](#)  
919  
920

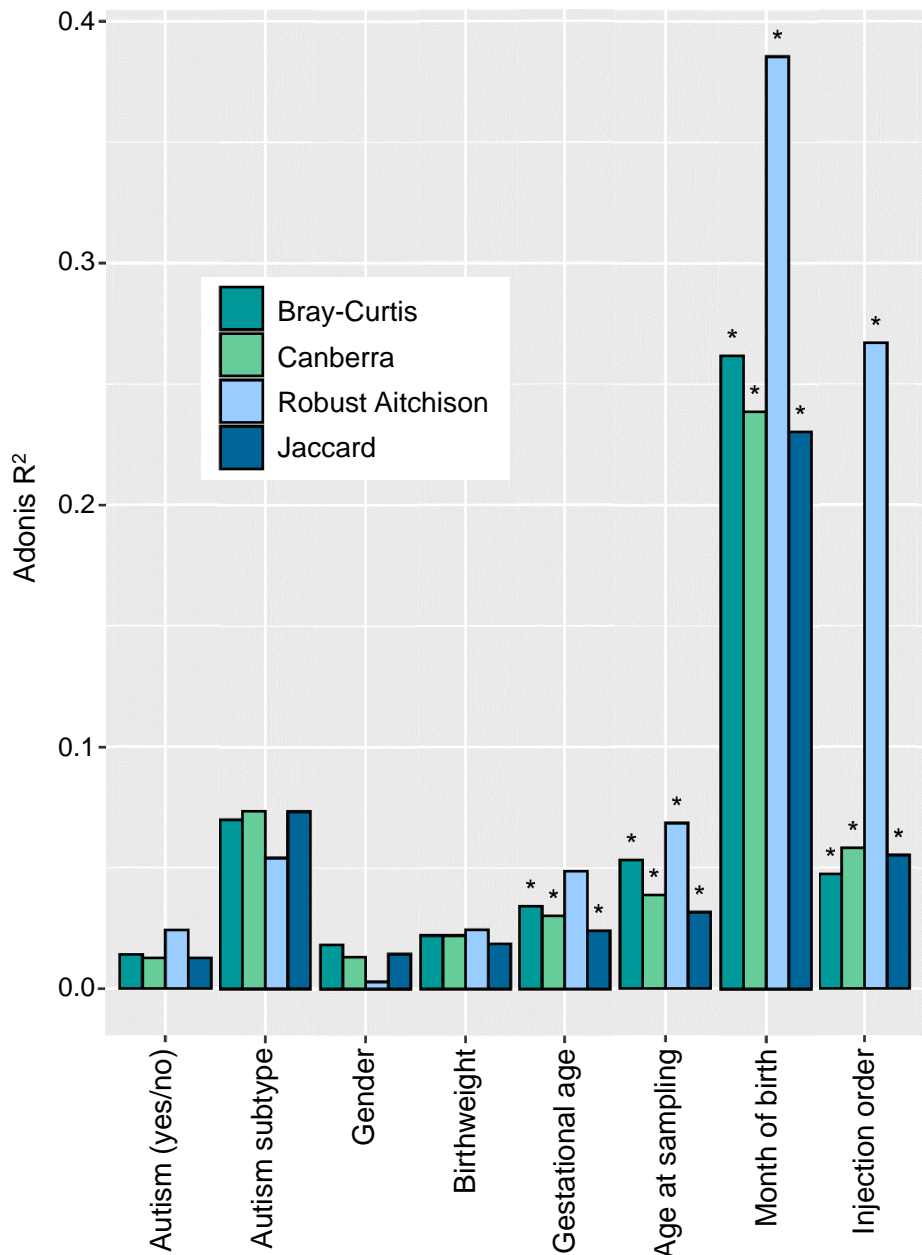

921 **Additional files**

922 Additional file 1:

923 Standardized reporting of untargeted metabolomics LC-MS/MS method according to [60] containing  
924 the list of internal standards from the Neobase Non-derivatized MSMS kit and their concentration in  
925 the extraction buffer

926 [See .xlsx](#)

927

928 Additional file 2:

929 MZmine batch .xml file used to preprocess the raw data

930 [See .xml](#)

931

932 Additional file 3:

933 Compound Discoverer 2.1 preprocessing workflow settings

934 [See .pdf](#)

935

936 Additional file 4ab:

937 PEG (4a) and PPG (4b) filtering scripts using the Kendrick Mass filter according to [80]

938 [See the two .ipynb](#)

939 [Can be opened using https://jupyter.org/](https://jupyter.org/)

940

941 Additional file 5:

942 Targeted analysis of outliers using TraceFinder (IS and unlabeled homologs) and heatmap of  
943 untargeted analysis

944 [See .pdf](#)

945

946 Additional file 6:

947 Subjects characteristics in details

948 [See .xlsx](#)

949

950 Additional file 7:

951 All features including annotated compounds. Out of the 4360 features detected, 150 could be annotated  
952 by GNPS library matching (annotation level 2) or in-house Trace Finder library (annotation level 1)  
953 and an additional 859 by MolNetEnhancer (annotation level 3).

954 [See .xlsx](#)

955

956 Additional file 8:

957 PERMANOVAs Adonis  $R^2$  values and p-values calculated with (74 samples) and without (68 samples)  
958 outliers

959 [See .xlsx](#)

960

961 Additional file 9:

962 Full list of compounds with t-test p value  $<0.01$  without FDR correction and/or with Wilcoxon rank-  
963 sum test p value  $<0.01$  without FDR correction and/or case/control fold change value  $<0.5$  or  $>2$ .

964 [See .xlsx](#)

965

966 Additional file 10: Fragmentation profiles of the two unknown features to be monitored in future  
967 studies as well as methacholine as shown in Table 2.

968 [See .pdf](#)

969

970 Additional file 11: Full list of compounds reported in the literature as involved in ASD and considered  
971 in this study.

972 [See .xlsx](#)

973
